# Supplementary material for: Cobalt(iii)–salen decorated stereoregular optically active helical polyisocyanides enable highly effective cooperative asymmetric catalysis toward the kinetic resolution of epoxides
Source: Royal Society of Chemistry journal article supplement (doi:10.1039/d3qi00384a), 2023-01-01
Supplement: d3qi00384a1.pdf [file d3qi00384a1.pdf]

## Supporting Information

# Cobalt(III)-salen Decorated Stereoregular Optical Helical Polyisocyanides Enable Highly Effective Cooperative Asymmetric Catalysis toward Kinetic Resolution of Epoxides

*Shu-Ming Kang,<sup>1,3,†</sup> Xue Song,<sup>1,†</sup> Ting-Ting Zhang,<sup>1</sup> Lei Xu,<sup>1</sup> Yuan-Yuan Zhu\*<sup>1</sup> and Zong-Quan Wu\*<sup>2</sup>*

<sup>1</sup> School of Chemistry and Chemical Engineering, Anhui Key Laboratory of Advanced Catalytic Materials and Reaction Engineering, Hefei University of Technology, 193 Tunxi Road, Hefei 230009, China

<sup>2</sup> State Key Laboratory of Supramolecular Structure and Materials, College of Chemistry, Jilin University, Changchun 130012, China

<sup>3</sup> Beijing National Laboratory for Molecular Sciences, Key Laboratory of Polymer Chemistry and Physics of Ministry of Education, College of Chemistry and Molecular Engineering, Peking University, Beijing 100871, China

E-mail: yyzhu@hfut.edu.cn (Y.-Y. Z.) and zqwu@jlu.edu.cn (Z.-Q. W.)

## Table of Contents

|                                                                                                     |    |
|-----------------------------------------------------------------------------------------------------|----|
| Table of Contents.....                                                                              | 2  |
| SI1 Instruments and Materials .....                                                                 | 3  |
| SI1.1 Instruments and Measurement conditions.....                                                   | 3  |
| SI1.2 Materials.....                                                                                | 5  |
| SI2 Synthesis and Characterization of Intermediates, Monomers, and Polymer-supported Catalysts..... | 6  |
| SI3 The Details of Catalytic Studies on Kinetic Resolution of Epoxides.....                         | 13 |
| SI3.1 The Studies on Kinetic Resolution of Epoxides.....                                            | 13 |
| SI3.2 The Evaluation of Catalytic Activity and Recycle Ability.....                                 | 35 |
| SI3.3 The Application to Pharmaceutical Synthesis.....                                              | 37 |
| SI4 NMR Spectra of Organic Compounds and Polymers. ....                                             | 38 |
| References.....                                                                                     | 54 |

## SI1 Instruments and Materials

### SI1.1 Instruments and Measurement conditions

**Structural characterization measurements.** The NMR spectra were recorded on a Bruker 400 or 600 MHz spectrometer. The chemical shifts ( $\delta$ ) in  $^1\text{H}$  NMR were reported in ppm relative to tetramethylsilane ( $\text{Me}_4\text{Si}$ ) as internal standard (0.0 ppm) or proton resonance resulting from incomplete deuteration of NMR solvent  $\text{CDCl}_3$  (7.26 ppm). Coupling constants ( $J$ ) are expressed in hertz.  $^{13}\text{C}$  NMR spectra were recorded at 101 MHz or 151 MHz, and the chemical shifts ( $\delta$ ) were reported in ppm relative to  $\text{CDCl}_3$  (77.10 ppm). HRMS analyses were performed on a Thermo Scientific Vanquish Q Exactive Plus system or a Bruker Solarix XR Fourier Transform Ion Cyclotron Resonance Mass Spectrometer.

**Circular dichroism (CD).** CD spectra were obtained in a 0.1 cm quartz cell using a JASCO J1500 spectropolarimeter. All the samples, including polymers and small molecules, were dissolved in specific organic solvents, and measured at 25 °C. The salen units in all samples were fixed as  $1.5 \times 10^{-4}$  mol/L and measured in the range of 270 to 500 nm for **M1**, **P1** and **P1-Co-N<sub>3</sub>**, and in the range of 250 to 500 nm for **S1** and **S1-Co-N<sub>3</sub>**.

**Size exclusion chromatograms (SEC).** Molecular weights and molecular weight distributions were determined by a Waters 1515 pump and a Waters 2414 differential refractive index detector (set at 40 °C) with THF as a flow phase.

**High Performance Liquid Chromatography (HPLC).** HPLC were measured by JASCO Co. Ltd., with JASCO UV-4070 and CD-4095 detectors, and a JASCO Pu-418 pump, with *n*-hexane/*i*-PrOH as the flow phase.

**High-Angle Annular Dark Field Scanning Transmission Electron Microscopy (HAADF-STEM).** HAADF-STEM observations were collected on a JEM-2100F high resolution transmission electron microscope at an acceleration voltage of 200.0 kV. The samples were prepared by casting the THF solutions of polymer **P1-Co-N<sub>3</sub>** on copper mesh grids and drying in air under ambient temperature.

**High Resolution Cold Field Emission Scanning Electron Microscopy (HR-FESEM).** HR-FESEM observations were collected on a Hitachi Regulus 8230 electron microscope. The

samples were prepared by casting the THF solutions of polymer **P1–Co–N<sub>3</sub>** on silicon substrate and drying in air under ambient temperature.

**Atomic force microscope (AFM).** AFM observations were performed on a Cypher S microscope (Oxford Instruments, Asylum Research). The samples were prepared by casting the THF solutions (0.01 mg/mL) of polymer **P1–Co–N<sub>3</sub>** on silicon substrate and drying in air under ambient temperature.

**Aberration-Corrected High-Angle Annular Dark-Field Scanning Transmission Electron Microscopy (AC-HAADF-STEM).** AC-HAADF-STEM observations were collected on a FEI Titan Cubed Themis G2 300 double spherical aberration correction transmission electron microscope at an acceleration voltage of 200.0 kV. The samples were prepared by casting the THF solutions of polymer **P1–Co–N<sub>3</sub>** on ultra-thin carbon films and drying in air under ambient temperature.

**X-ray Photoelectron Spectroscopy (XPS).** XPS characterization was performed on a Thermo ESCALAB250XI spectrometer using Al  $K_{\alpha}$  radiation (1486.6 eV) operated at 20 kV. Spectra were calibrated by adjusting the binding energy of C1s to 284.6 eV. XPS spectra were analysed using XPS Peak 4.1 software. The Gaussian-Lorentzian mix function was 30% (Gaussian-to-Lorentzian ratio) with Shirley background subtraction.

**Dynamic Light Scattering (DLS).** DLS measurements were carried on a Nano-ZS90 Zetasizer of Malvern (UK) instrument, and all data were averaged over three-time measurements. The sample solutions were filtrated through filter membrane before measurement.

**FT-IR spectra Measurements.** FT-IR spectra were recorded on Perkin-Elmer Spectrum BX FT-IR system using pure sample and attenuated total refraction (ATR) method at 25 °C.

**Elemental analysis.** Elemental analysis was carried on vario EL cube Elemental Analyzer (C, H, N) and Vario MICRO CUBE Elemental Analyzer (O) using pure sample.

**Computational simulation.** Both molecular mechanics (MM) structure optimization and molecular dynamics (MD) simulations were calculated using the Forcite module of the Materials Studio software (version 2019), and Compass force field were used during all simulations. The geometric parameters of the main chain were fixed during the following Forcite geometry optimization. The polymer models of **P1<sub>5</sub>–Co** and **P1<sub>32</sub>–Co** were constructed using the Polymer

Builder module in the MS Modeling software with the suitable side-chain conformations. Atom-based methods were applied for modeling and calculation of van der Waals and electrostatic potential energy. The convergence thresholds for geometry optimization calculations of all the models were set as  $1.0 \times 10^{-5}$  kcal·mol<sup>-1</sup> for energy,  $1.0 \times 10^{-5}$  Å for maximum displacement, and  $0.001$  kcal·mol<sup>-1</sup>·Å<sup>-1</sup> for maximum force. Then, we did dynamics simulations, canonical ensemble (NVT) was used, and the temperature was set to 298.15 K with the Nose temperature control method. The total simulation time was 200 ps with the step of 1 fs.

## **SI1.2 Materials**

All solvents were purchased from Sinopharm. Co. Ltd. and were purified by the standard procedures before use. All chemicals were obtained from Aladdin, Sinopharm and Sigma-Aldrich Chemical Co. Ltd., and were used as received without further purification otherwise denoted. THF and MeO'Bu were freshly distilled from sodium and using benzophenone as an indicator. Other solvents were dried over anhydrous CaH<sub>2</sub> and distilled before use.

## SI2 Synthesis and Characterization of Intermediates, Monomers, and Polymer-supported Catalysts.

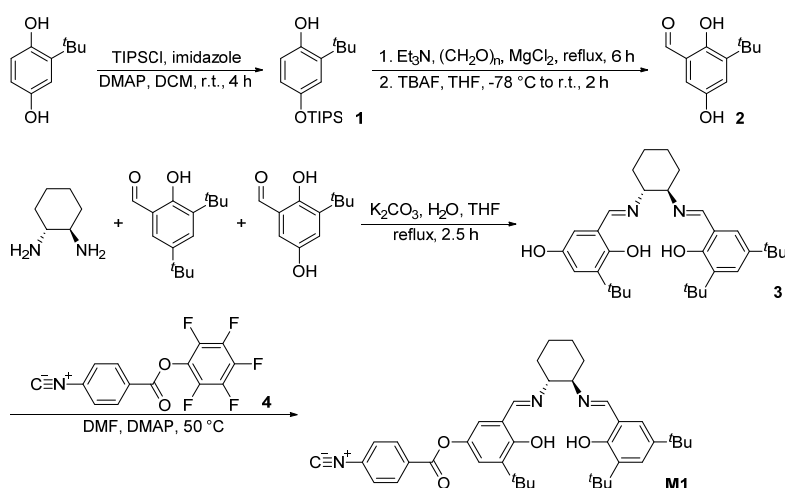

**Synthesis of 1.**[1] To a solution of *t*-butylhydroquinone (19.92 g, 120 mmol), DMAP (1.76 g, 14.4 mmol), and imidazole (10.21 g, 150 mmol) in anhydrous CH<sub>2</sub>Cl<sub>2</sub> (120 mL) was added *i*-Pr<sub>3</sub>SiCl (26.3 mL, 123 mmol). The solution was stirred at ambient temperature for 4 h, then quenched with sat. NH<sub>4</sub>Cl aqueous solution. The separated organic phase was washed with brine, dried over anhydrous Na<sub>2</sub>SO<sub>4</sub>, filtered, and concentrated. The residue was purified by rapid column chromatography (SiO<sub>2</sub>, petroleum ether/ethyl acetate, 9:1) to afford the pure product **1** as a yellow oil (35.19 g, 91%). <sup>1</sup>H NMR (600 MHz, CDCl<sub>3</sub>): δ 6.81 (d, *J* = 2.9 Hz, 1H), 6.57 (dd, *J*<sub>1</sub> = 8.4 Hz, *J*<sub>2</sub> = 2.9 Hz, 1H), 6.50 (d, *J* = 8.4 Hz, 1H), 4.41 (s, 1H), 1.37 (s, 9H), 1.25–1.18 (m, 3H), 1.10 (d, *J* = 7.4 Hz, 18H).

**Synthesis of 2.**[1] Compound **1** (35.12 g, 109 mmol) was dissolved in anhydrous MeCN (500 mL). Then Et<sub>3</sub>N (53.3 mL, 382.2 mmol), paraformaldehyde (19.66 g, 655.2 mmol), and anhydrous MgCl<sub>2</sub> (14.52 g, 152.9 mmol) were added under an N<sub>2</sub> atmosphere. The mixture was heated to reflux for 6 h, then cooled to ambient temperature and quenched with 1 M HCl aqueous solution (250 mL). The solution was filtered through Celite, rinsing with Et<sub>2</sub>O (50 mL × 3), and the layers were separated. The aqueous layer was extracted with Et<sub>2</sub>O (20 mL × 3), and the combined organic phase was washed with brine (200 mL), dried over anhydrous Na<sub>2</sub>SO<sub>4</sub>, filtered, and concentrated. The residue was dissolved in degassed THF (350 mL) and cooled to –78 °C. A

1.0 M aqueous solution of TBAF (124.5 mL, 124.5 mmol) was added slowly. After the completion of addition, the solution was warmed to ambient temperature for 2 h, then it was diluted with water and ethyl acetate and the layers were separated. The organic layer was washed with brine (200 mL), dried over anhydrous Na<sub>2</sub>SO<sub>4</sub>, filtered, and concentrated. The crude product was redissolved in CH<sub>2</sub>Cl<sub>2</sub> and cooled to 0 °C. The suspension was filtered, and the generated yellow solid was washed with cold CH<sub>2</sub>Cl<sub>2</sub>. Removing the solvent under vacuum to afford the pure product **2** as a yellow solid (10.48 g, 49% total yield from **1**). <sup>1</sup>H NMR (600 MHz, CDCl<sub>3</sub>): δ 11.38 (s, 1H), 9.79 (s, 1H), 7.10 (d, *J* = 3.1 Hz, 1H), 6.83 (d, *J* = 3.1 Hz, 1H), 4.69 (s, 1H), 1.40 (s, 9H).

**Synthesis of 3.[2]** To a solution of K<sub>2</sub>CO<sub>3</sub> (7.50 g, 54.6 mmol) and (1*R*,2*R*)-1,2-diaminocyclohexane (11.28 g, 49.5 mmol) in H<sub>2</sub>O (300 mL) was added THF (120 mL) and the solution was heated to reflux for 2 h. 3-*tert*-butyl-2,5-dihydroxybenzaldehyde (4.80 g, 24.66 mmol) and 3,5-di-*tert*-butyl-salicylaldehyde (17.31 g, 73.98 mmol) in THF (60 mL) were added dropwise over 30 min. After cooling to ambient temperature, the solution was poured into Et<sub>2</sub>O (600 mL) and the aqueous phase was washed with Et<sub>2</sub>O (100 mL × 2). The combined organic phase was washed with brine (150 mL), dried over anhydrous Na<sub>2</sub>SO<sub>4</sub>, filtrated, and concentrated. The residue was purified by rapid column chromatography (SiO<sub>2</sub>, petroleum ether/ethyl acetate, 9:1), concentrated and freeze-dried from CH<sub>2</sub>Cl<sub>2</sub>/benzene to afford **3** as a yellow solid (3.59 g, 77%). <sup>1</sup>H NMR (600 MHz, CDCl<sub>3</sub>): δ 8.28 (s, 1H), 8.18 (s, 1H), 7.31 (d, *J* = 2.5 Hz, 1H), 6.96 (d, *J* = 2.4 Hz, 1H), 6.80 (d, *J* = 3.1 Hz, 1H), 6.45 (d, *J* = 3.1 Hz, 1H), 3.35–3.27 (m, 1H), 1.95 (d, *J* = 13.8 Hz, 2H), 1.87 (d, *J* = 8.5 Hz, 2H), 1.78–1.68 (m, 2H), 1.50–1.43 (m, 2H), 1.41 (s, 9H), 1.38 (s, 9H), 1.23 (s, 9H).

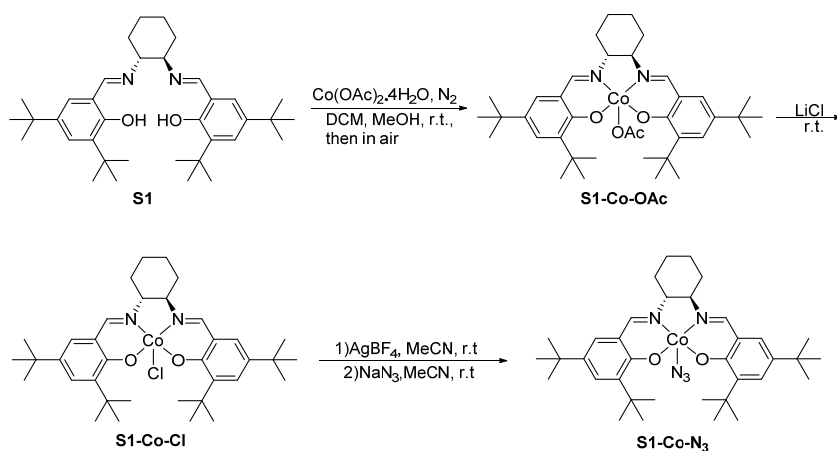

**Synthesis of S1–Co–N<sub>3</sub>. [3]** Small molecular control S1–Co–N<sub>3</sub> was synthesized according to the literature method. The complex was afforded as a brown solid with yield of 84%. HRMS (ESI-FT): Calcd. For [M + H]<sup>+</sup>, C<sub>36</sub>H<sub>53</sub>CoN<sub>5</sub>O<sub>2</sub><sup>+</sup>: 646.3529. Found: 646.3531.

**Table S1.** Polymerization results of salen-decorated isocyanides M1 with I1 as the initiator.

| Entry | Solvent           | [M] <sub>0</sub> /[cat] <sub>0</sub> | M <sub>n</sub> (kDa) <sup>a</sup> | M <sub>w</sub> /M <sub>n</sub> <sup>a</sup> | Yield (%) <sup>b</sup> |
|-------|-------------------|--------------------------------------|-----------------------------------|---------------------------------------------|------------------------|
| 1     | CHCl <sub>3</sub> | 100                                  | 71.4                              | 1.51                                        | 62                     |
| 2     | <b>THF</b>        | <b>100</b>                           | <b>143.3</b>                      | <b>1.23</b>                                 | <b>84</b>              |
| 3     | THF               | 25                                   | 35.7                              | 1.29                                        | 68                     |
| 4     | THF               | 50                                   | 70.9                              | 1.27                                        | 74                     |
| 5     | THF               | 150                                  | 199.6                             | 1.25                                        | 90                     |
| 6     | THF               | 200                                  | 289.7                             | 1.10                                        | 92                     |

<sup>a</sup>The M<sub>n</sub> and M<sub>w</sub>/M<sub>n</sub> values were determined by SEC with reference to polystyrene standards. <sup>b</sup>Isolated yields.

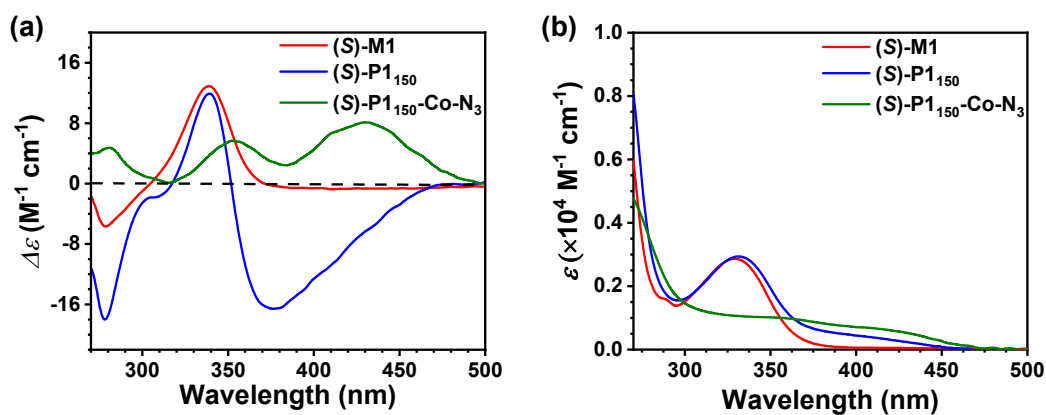

**Figure S1.** CD (a) and UV-vis spectra (b) of (S)-M1, (S)-P1<sub>150</sub>, and (S)-P1<sub>150</sub>-Co-N<sub>3</sub> measured in THF at 25 °C ( $c = 1.5 \times 10^{-4}$  M according to amount of salen units).



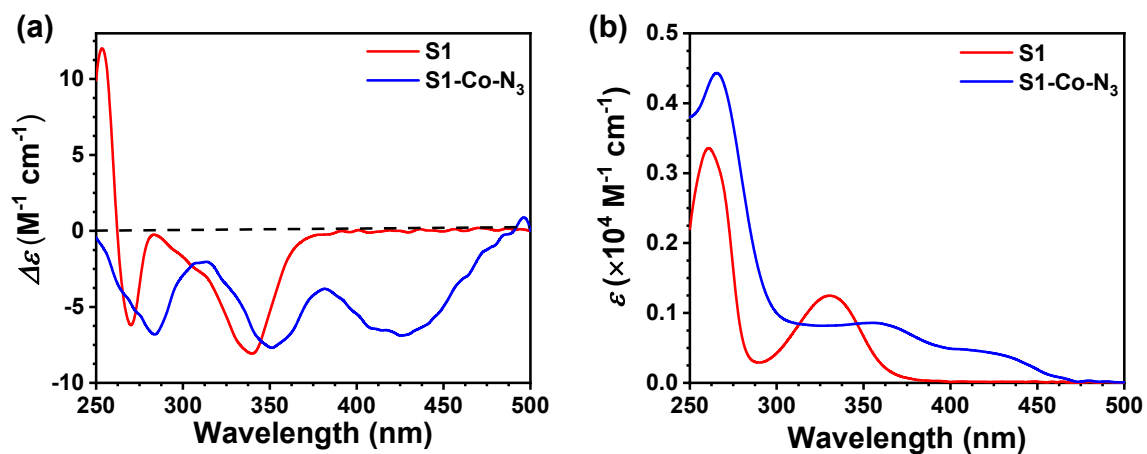

Figure S2. CD (a) and UV-vis spectra (b) of S1 and S1-Co-N<sub>3</sub> measured in THF at 25 °C ( $c = 1.5 \times 10^{-4}$  M).

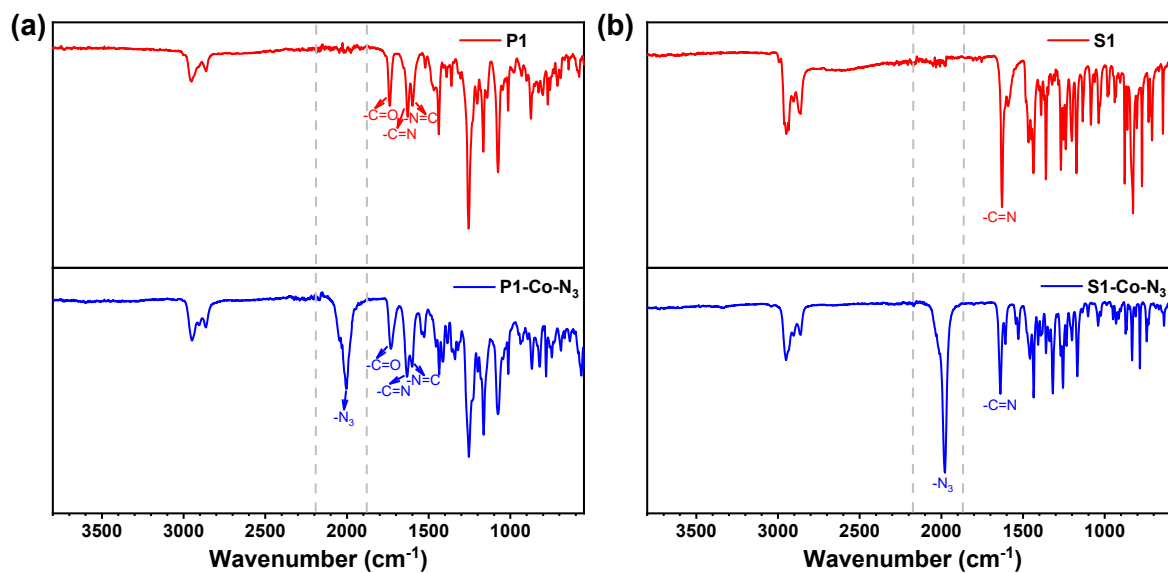

Figure S3. FT-IR spectra of (a) P1 and P1-Co-N<sub>3</sub>; and (b) S1 (4) and S1-Co-N<sub>3</sub>.

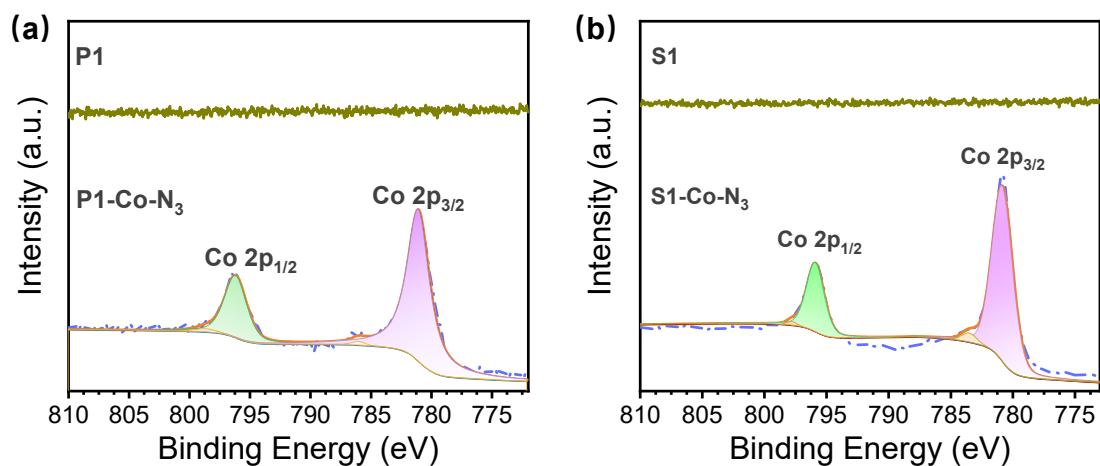

Figure S4. XPS Co 2p spectra of (a) pristine P1, P1-Co-N<sub>3</sub>, and (b) pristine S1, S1-Co-N<sub>3</sub>, respectively.

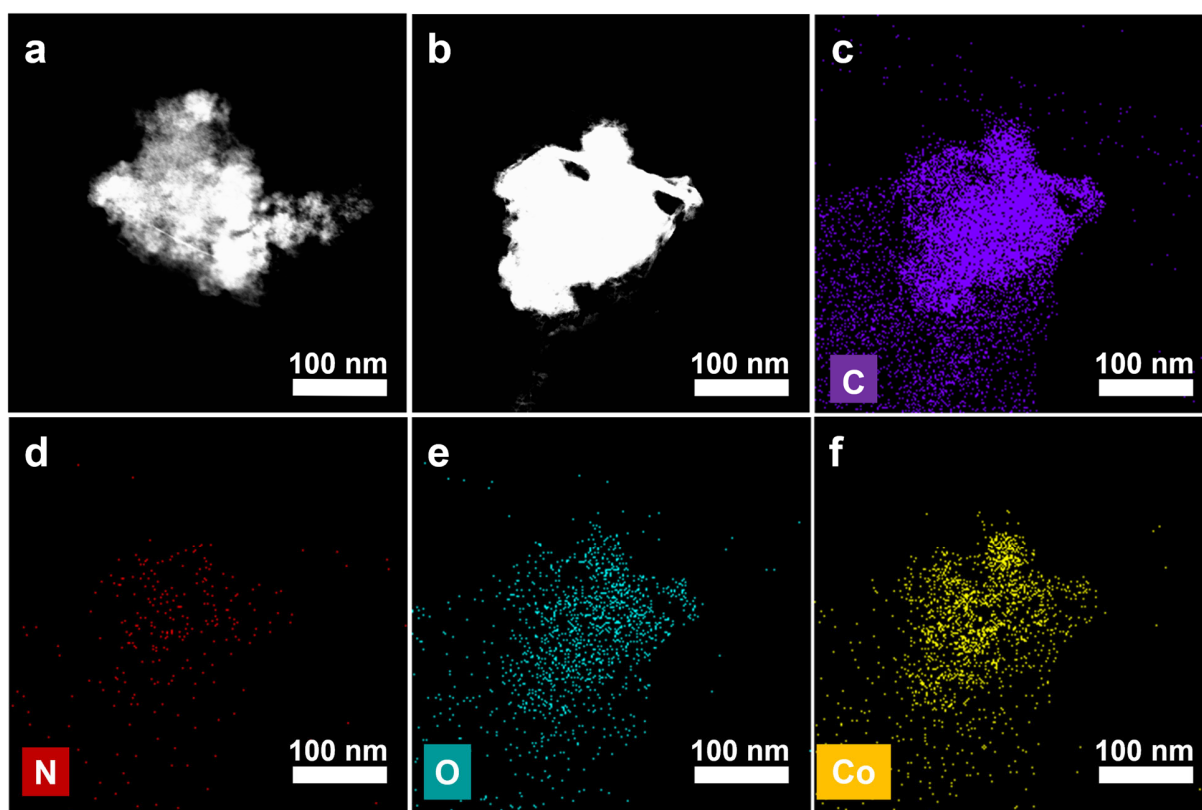

Figure S5. HAADF-STEM images of P1-Co-N<sub>3</sub> in THF (0.01 mg mL<sup>-1</sup>) on copper mesh grids (a-b), and corresponding EDS mappings of merged elements, C (c), N (d), O (e), Co (f), respectively.

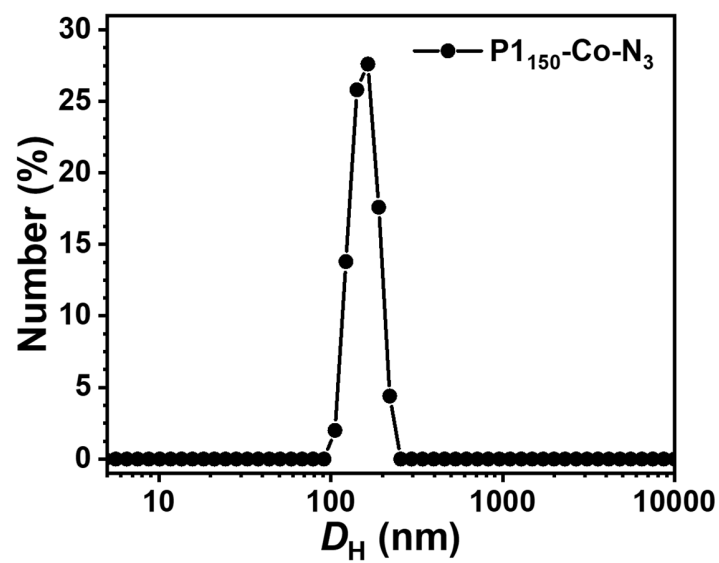

Figure S6. DLS curves of  $P1_{150}\text{-Co-N}_3$  (0.05 mg/mL in THF).

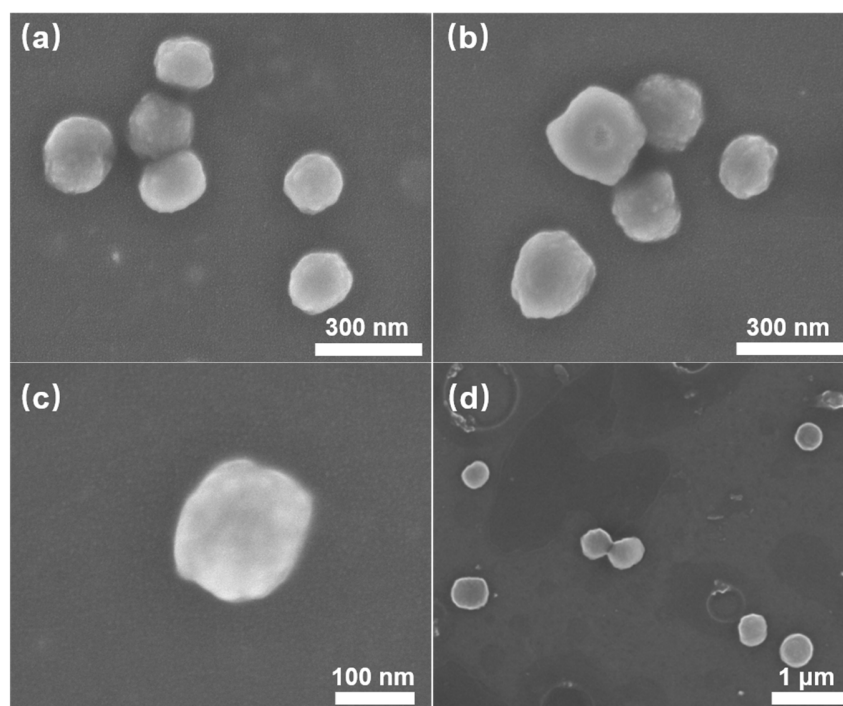

Figure S7. HR-FESEM images of  $P1\text{-Co-N}_3$  in THF (0.02 mg/mL) on silicon substrate.

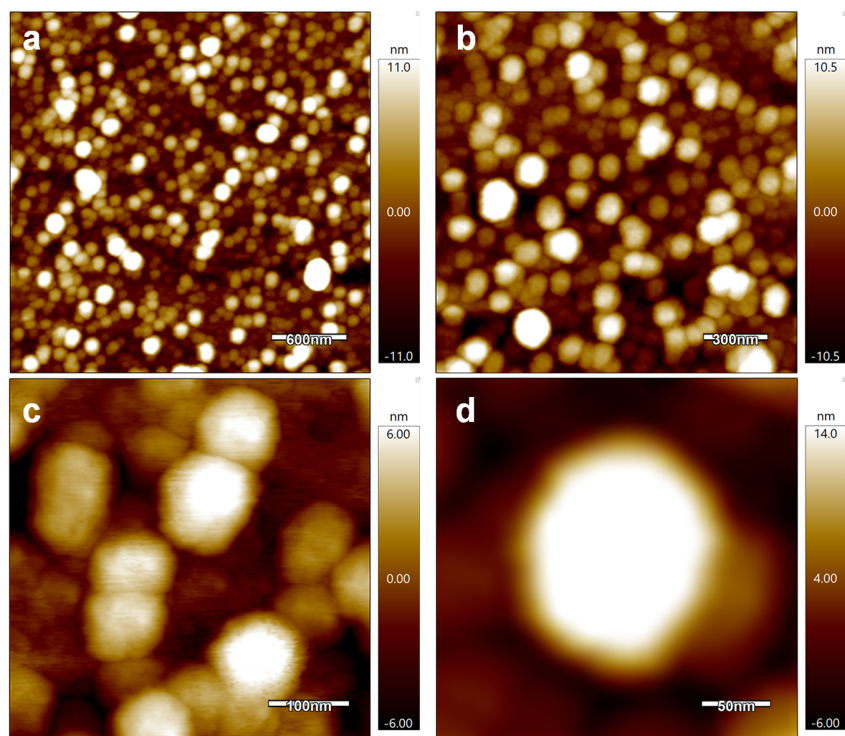

**Figure S8.** AFM images of **P1-Co-N<sub>3</sub>** in THF (0.01 mg/mL) on silicon substrate.

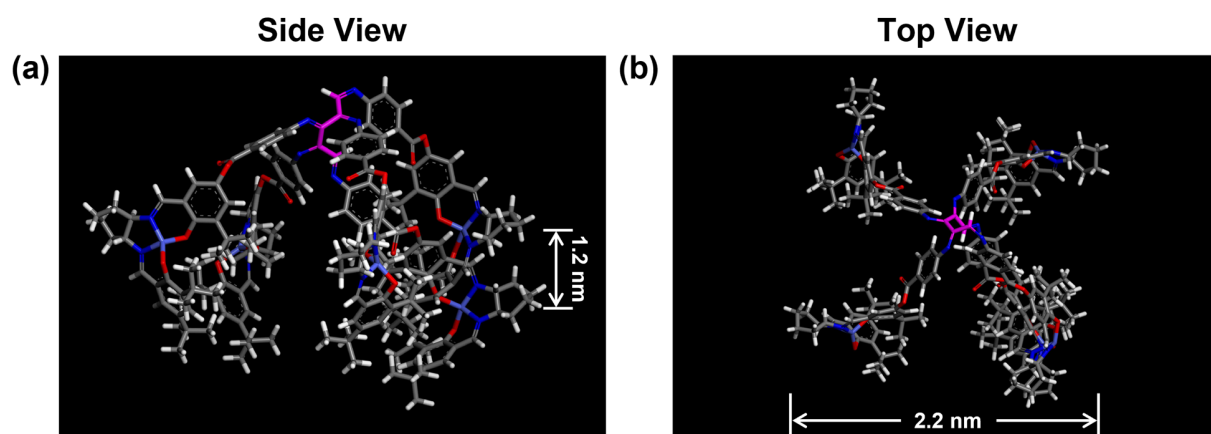

**Figure S9.** The side (a) and top (b) views of computational-simulated optimal helical conformation for **P1<sub>5</sub>-Co**. Molecular modelling and molecular mechanics calculations were performed on Materials Studio software (version 2019, Accelrys Software Inc.) implemented with the COMPASS force field.

## SI3 The Details of Catalytic Studies on Kinetic Resolution of Epoxides

### SI3.1 The Studies on Kinetic Resolution of Epoxides

The racemic epoxide substrates **5a**, **5f**, **5g**, **5h**, **5i** were purchased from Aladdin and Sigma-Aldrich Co. Ltd. and were used as received without further purification otherwise denoted. The other racemic epoxide substrates **5b**,<sup>[4]</sup> **5c**,<sup>[5]</sup> **5d**,<sup>[6]</sup> **5e**,<sup>[7]</sup> and **5j**<sup>[8]</sup> were synthesized according to the literature methods.

The racemic **6a** was synthesized from the reaction of epoxide **5a** and TMSN<sub>3</sub> catalyzed by Er(OTf)<sub>3</sub> according to the literature method.<sup>[9]</sup>

The ten racemic azide alcohols **7a-j** were synthesized from the reactions of relative epoxides and sodium azide in the presence of ammonium chloride at 80 °C for 2–10 h according to the literature method.<sup>[10]</sup>

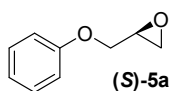

**(S)-5a.[11]** Colorless oil; purification conditions: SiO<sub>2</sub>, petroleum ether/ethyl acetate, 19:1; 67 mg, isolated yield: 45%. The *ee* value 99% on HPLC (Chiralcel OD-H column): 90/10 *n*-hexane/*i*-PrOH; flow rate 1.0 mL/min; detection wavelength: 220 nm; retention time: 8.167 min (minor), 13.208 min (major). <sup>1</sup>H NMR (400 MHz, CDCl<sub>3</sub>): δ 7.30 (dd, *J*<sub>1</sub> = 8.7 Hz, *J*<sub>2</sub> = 7.3 Hz, 2H), 7.02–6.90 (m, 3H), 4.22 (dd, *J*<sub>1</sub> = 11.0 Hz, *J*<sub>2</sub> = 3.2 Hz, 1H), 3.97 (dd, *J*<sub>1</sub> = 11.0 Hz, *J*<sub>2</sub> = 5.6 Hz, 1H), 3.43–3.30 (m, 1H), 2.99–2.86 (m, 1H), 2.77 (dd, *J*<sub>1</sub> = 5.0 Hz, *J*<sub>2</sub> = 2.7 Hz, 1H). HRMS (ESI-FT): Calcd. For [M + H]<sup>+</sup>, C<sub>9</sub>H<sub>11</sub>O<sub>2</sub><sup>+</sup>: 151.0754; Found: 151.0756.

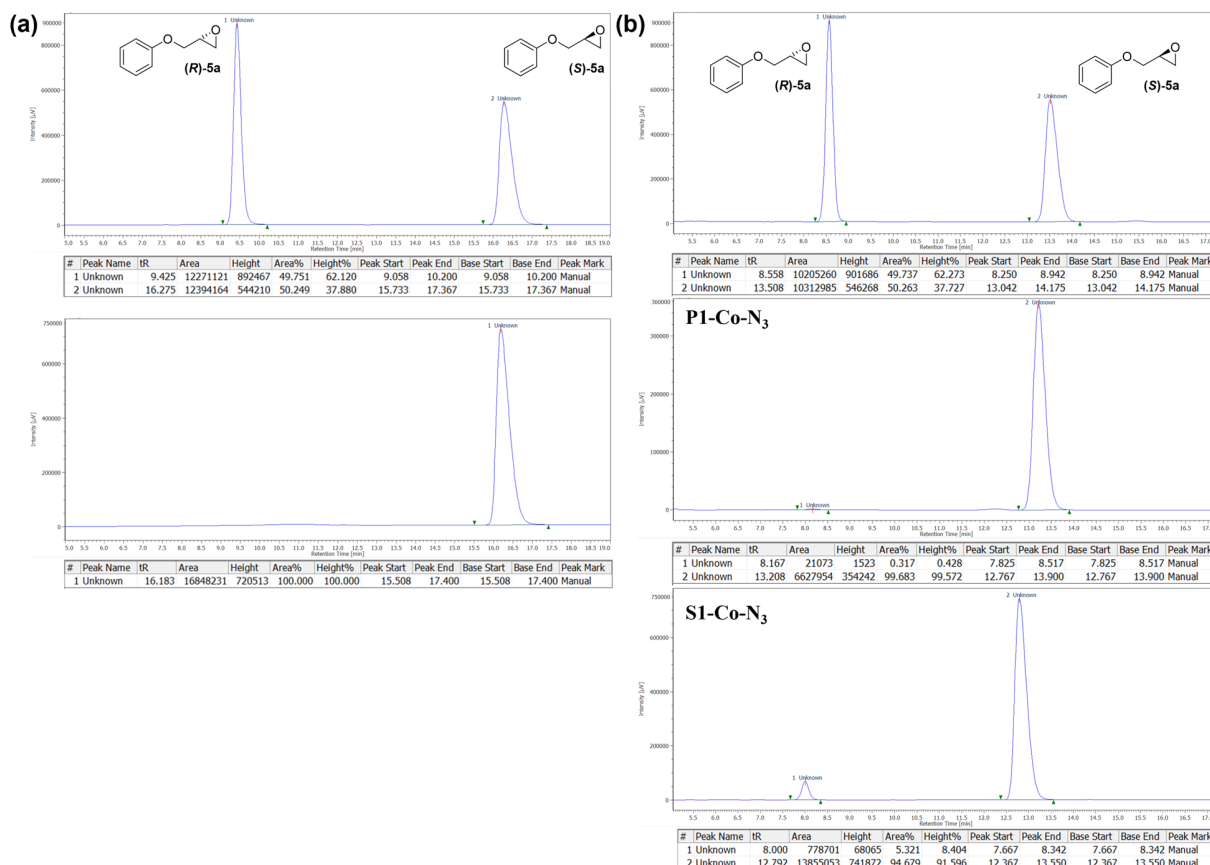

**Figure S10.** (a) The merged HPLC curves of (±)-5a and the purchased enantiopure (S)-5a, respectively. So, the absolute configuration of the compounds corresponding to each peak in this series epoxide substrates was determined;<sup>[12]</sup> (b) The merged HPLC curves of (±)-5a and the resolved ones by P1-Co-N<sub>3</sub> and S1-Co-N<sub>3</sub>, respectively.

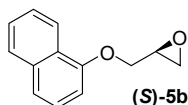

**(S)-5b.[13]** Colorless oil; purification conditions: SiO<sub>2</sub>, petroleum ether/ethyl acetate, 19:1; 96 mg, 48% isolated yield. The *ee* 96% on HPLC (Chiralcel OD-H column): 90/10 *n*-hexane/*i*-PrOH; flow rate 1.0 mL/min; detection wavelength: 220 nm; retention time: 11.808 min (minor), 14.250 min (major). <sup>1</sup>H NMR (600 MHz, CDCl<sub>3</sub>): δ 8.34–8.29 (m, 1H), 7.81 (dd, *J*<sub>1</sub> = 6.5 Hz, *J*<sub>2</sub> = 2.9 Hz, 1H), 7.53–7.48 (m, 2H), 7.46 (d, *J* = 8.3 Hz, 1H), 7.41–7.34 (m, 1H), 6.82 (d, *J* = 7.6 Hz, 1H), 4.41 (dd, *J*<sub>1</sub> = 10.9 Hz, *J*<sub>2</sub> = 3.1 Hz, 1H), 4.15 (dd, *J*<sub>1</sub> = 10.9 Hz, *J*<sub>2</sub> = 5.6 Hz, 1H), 3.51 (ddt, *J*<sub>1</sub> = 5.7 Hz, *J*<sub>2</sub> = 4.1 Hz, *J*<sub>3</sub> = 2.9 Hz, 1H), 2.98 (dd, *J*<sub>1</sub> = 4.9 Hz, *J*<sub>2</sub> = 4.1 Hz, 1H), 2.86 (dd, *J*<sub>1</sub> = 4.9 Hz, *J*<sub>2</sub> = 2.7 Hz, 1H). HRMS (ESI-FT): Calcd. For [M + H]<sup>+</sup>, C<sub>13</sub>H<sub>13</sub>O<sub>2</sub><sup>+</sup>: 201.0910; Found: 201.0909.

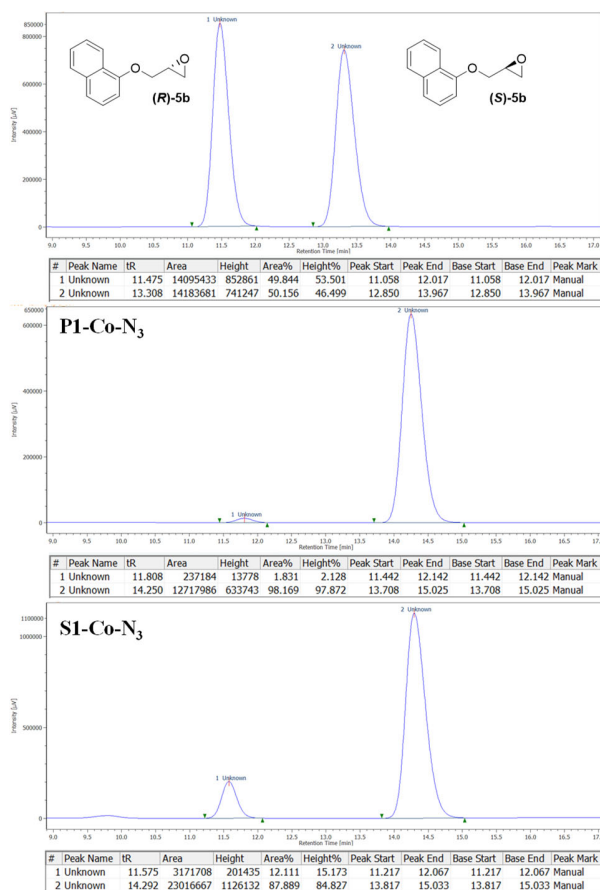

**Figure S11.** The merged HPLC curves of (±)-**5b** and the resolved ones by **P1-Co-N<sub>3</sub>** and **S1-Co-N<sub>3</sub>**, respectively.

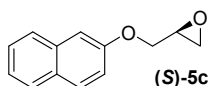

**(S)-5c.[5]** White solid; purification conditions: SiO<sub>2</sub>, petroleum ether/ethyl acetate, 19:1; 102 mg, 51% isolated yield. The *ee* 86% on HPLC (Chiralcel OD-H column): 90/10 *n*-hexane/*i*-PrOH; flow rate 1.0 mL/min; detection wavelength: 220 nm; retention time: 10.525 min (minor), 11.217 min (major). <sup>1</sup>H NMR (600 MHz, CDCl<sub>3</sub>): δ 7.82–7.73 (m, 3H), 7.47 (t, *J* = 7.6 Hz, 1H), 7.38 (t, *J* = 7.5 Hz, 1H), 7.22 (dd, *J*<sub>1</sub> = 8.9 Hz, *J*<sub>2</sub> = 2.6 Hz, 1H), 7.16 (d, *J* = 2.6 Hz, 1H), 4.34 (dd, *J*<sub>1</sub> = 10.9 Hz, *J*<sub>2</sub> = 3.1 Hz, 1H), 4.06 (dd, *J*<sub>1</sub> = 10.9 Hz, *J*<sub>2</sub> = 5.7 Hz, 1H), 3.43 (d, *J* = 3.4 Hz, 1H), 2.94 (t, *J* = 4.6 Hz, 1H), 2.81 (dd, *J*<sub>1</sub> = 5.0 Hz, *J*<sub>2</sub> = 2.6 Hz, 1H). HRMS (ESI-FT): Calcd. For [M + H]<sup>+</sup>, C<sub>13</sub>H<sub>13</sub>O<sub>2</sub><sup>+</sup>: 201.0910; Found: 209.0908.

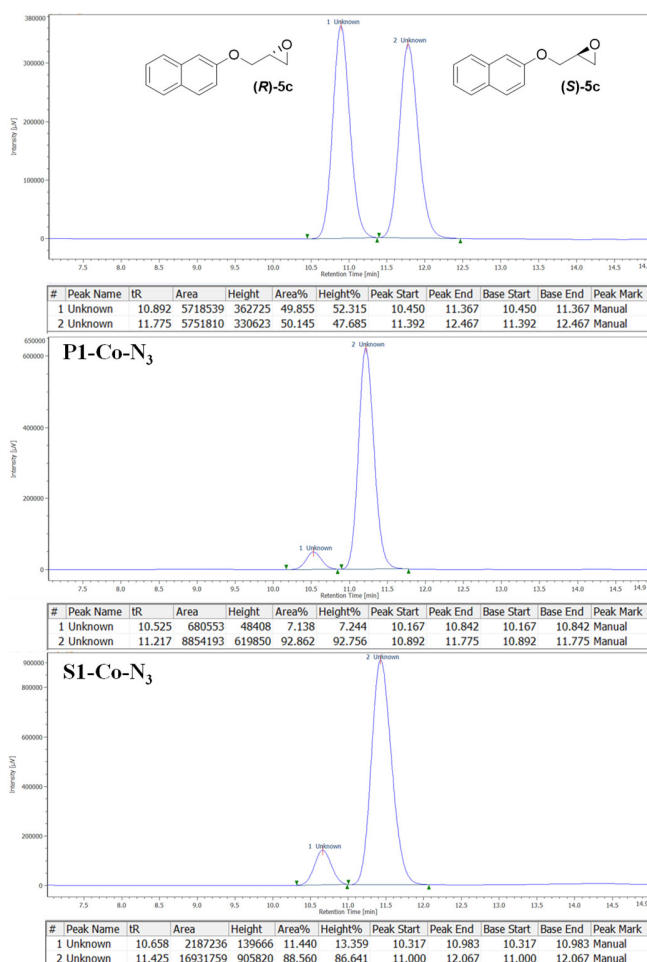

**Figure S12.** The merged HPLC curves of (±)-5c and the resolved ones by P1-Co-N<sub>3</sub> and S1-Co-N<sub>3</sub>, respectively.



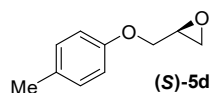

**(S)-5d.[11]** Colorless oil; purification conditions: SiO<sub>2</sub>, petroleum ether/ethyl acetate, 10:1; 73 mg, 45% isolated yield. The *ee* 99% on HPLC (Chiralcel OD-H column): 90/10 *n*-hexane/*i*-PrOH; flow rate 1.0 mL/min; detection wavelength: 220 nm; retention time: 7.717 min (minor), 9.533 min (major). <sup>1</sup>H NMR (400 MHz, CDCl<sub>3</sub>): δ 7.10 (d, *J* = 8.3 Hz, 2H), 6.83 (d, *J* = 8.5 Hz, 2H), 4.19 (dd, *J*<sub>1</sub> = 11.0 Hz, *J*<sub>2</sub> = 3.2 Hz, 1H), 3.93 (dd, *J*<sub>1</sub> = 11.0 Hz, *J*<sub>2</sub> = 5.6 Hz, 1H), 3.35 (dq, *J*<sub>1</sub> = 5.8 Hz, *J*<sub>2</sub> = 2.9 Hz, 1H), 2.90 (t, *J* = 4.5 Hz, 1H), 2.76 (dd, *J*<sub>1</sub> = 4.9 Hz, *J*<sub>2</sub> = 2.6 Hz, 1H), 2.30 (s, 3H). HRMS (ESI-FT): Calcd. For [M + H]<sup>+</sup>, C<sub>10</sub>H<sub>13</sub>O<sub>2</sub><sup>+</sup>: 165.0910; Found: 165.0917.

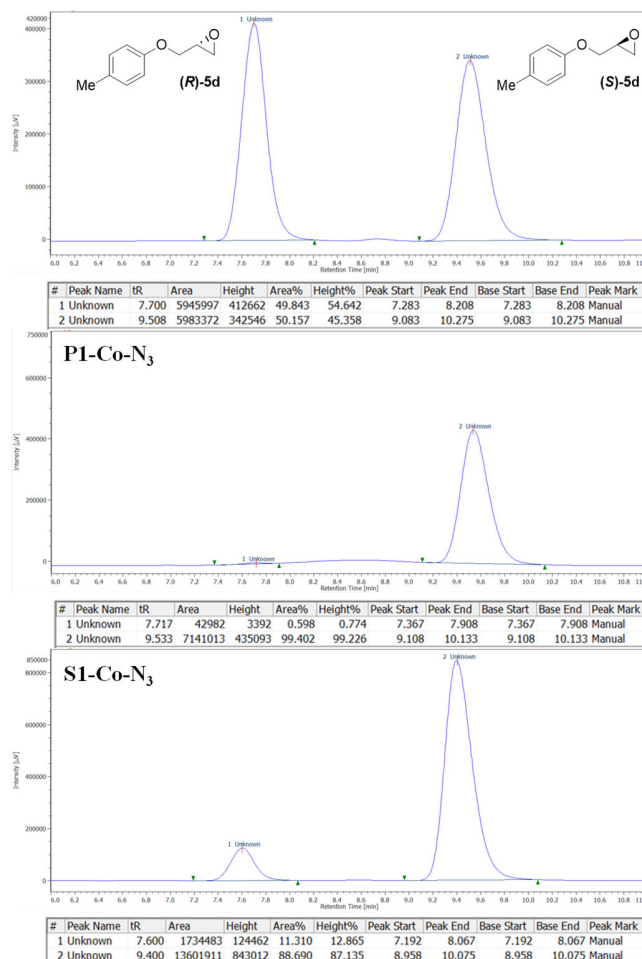

**Figure S13.** The merged HPLC curves of (±)-5d and the resolved ones by P1-Co-N<sub>3</sub> and S1-Co-N<sub>3</sub>, respectively.

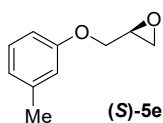

**(S)-5e.[13]** Colorless oil; purification conditions: SiO<sub>2</sub>, petroleum ether/ethyl acetate, 10:1; 113 mg, 69% isolated yield. The *ee* 61% on HPLC (Chiralcel OD-H column): 90/10 *n*-hexane/*i*-PrOH; flow rate 1.0 mL/min; detection wavelength: 220 nm; retention time: 9.117 min (minor), 17.725 min (major). <sup>1</sup>H NMR (400 MHz, CDCl<sub>3</sub>): δ 7.18 (t, *J* = 7.8 Hz, 1H), 6.80 (d, *J* = 7.5 Hz, 1H), 6.78–6.71 (m, 2H), 4.20 (dd, *J*<sub>1</sub> = 11.0 Hz, *J*<sub>2</sub> = 3.2 Hz, 1H), 3.95 (dd, *J*<sub>1</sub> = 11.0 Hz, *J*<sub>2</sub> = 5.6 Hz, 1H), 3.36 (dq, *J*<sub>1</sub> = 5.6 Hz, *J*<sub>2</sub> = 3.1 Hz, 1H), 2.91 (t, *J* = 4.6 Hz, 1H), 2.76 (dd, *J*<sub>1</sub> = 4.9 Hz, *J*<sub>2</sub> = 2.7 Hz, 1H), 2.34 (s, 3H). HRMS (ESI-FT): Calcd. For [M + H]<sup>+</sup>, C<sub>10</sub>H<sub>13</sub>O<sub>2</sub><sup>+</sup>: 165.0910; Found: 165.0914.

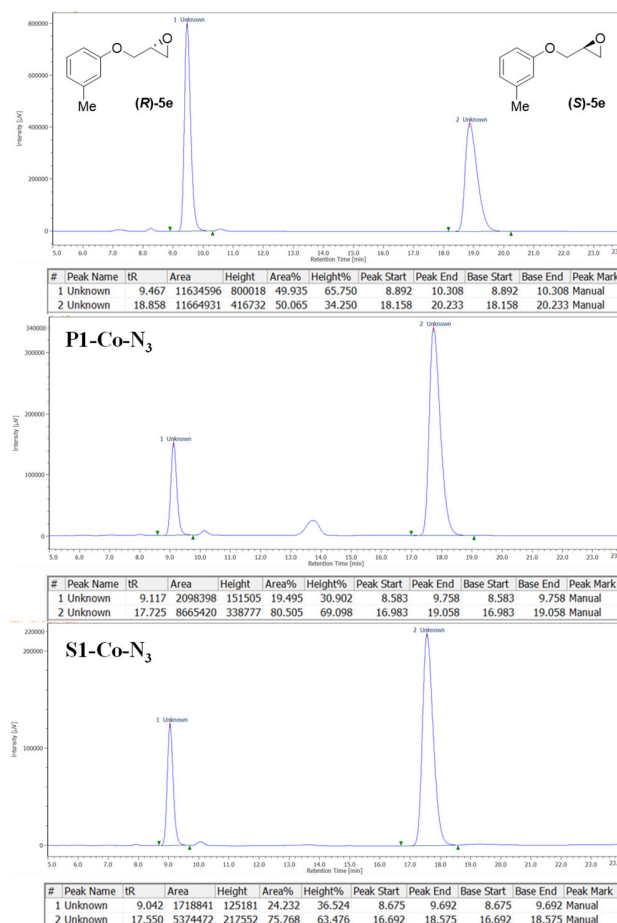

**Figure S14.** The merged HPLC curves of (±)-5e and the resolved ones by P1-Co-N<sub>3</sub> and S1-Co-N<sub>3</sub>, respectively.

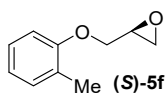

**(S)-5f.[13]** Colorless oil; purification conditions: SiO<sub>2</sub>, petroleum ether/ethyl acetate, 10:1; 92 mg, 56% isolated yield. The *ee* 63% on HPLC (Chiralcel OD-H column): 90/10 *n*-hexane/*i*-PrOH; flow rate 1.0 mL/min; detection wavelength: 220 nm; retention time: 6.758 min (minor), 9.142 min (major). <sup>1</sup>H NMR (400 MHz, CDCl<sub>3</sub>): δ 7.19–7.12 (m, 2H), 6.90 (t, *J* = 6.8 Hz, 1H), 6.82 (d, *J* = 9.5 Hz, 1H), 4.24 (dd, *J*<sub>1</sub> = 11.1 Hz, *J*<sub>2</sub> = 3.1 Hz, 1H), 3.99 (dd, *J*<sub>1</sub> = 11.1 Hz, *J*<sub>2</sub> = 5.4 Hz, 1H), 3.43–3.34 (m, 1H), 2.95–2.88 (m, 1H), 2.80 (dd, *J*<sub>1</sub> = 5.0 Hz, *J*<sub>2</sub> = 2.7 Hz, 1H), 2.27 (s, 3H). HRMS (ESI-FT): Calcd. For [M + H]<sup>+</sup>, C<sub>10</sub>H<sub>13</sub>O<sub>2</sub><sup>+</sup>: 165.0910; Found: 165.0919.

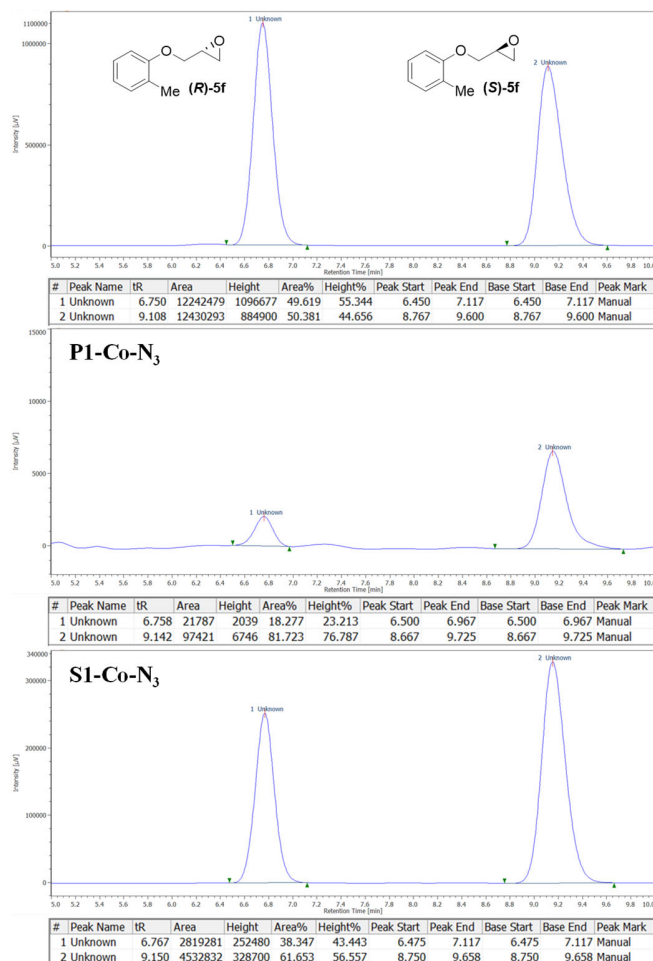

**Figure S15.** The merged HPLC curves of (±)-5f and the resolved ones by P1-Co-N<sub>3</sub> and S1-Co-N<sub>3</sub>, respectively.

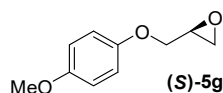

**(S)-5g.[11]** White solid; purification conditions: SiO<sub>2</sub>, petroleum ether/ethyl acetate, 6:1; 88 mg, 49% isolated yield. The *ee* 92% on HPLC (Chiralcel OD-H column): 90/10 *n*-hexane/*i*-PrOH; flow rate 1.0 mL/min; detection wavelength: 215 nm; retention time: 10.225 min (minor), 14.192 min (major). <sup>1</sup>H NMR (400 MHz, CDCl<sub>3</sub>): δ 6.90–6.79 (m, 4H), 4.17 (dd, *J*<sub>1</sub> = 11.1 Hz, *J*<sub>2</sub> = 3.2 Hz, 1H), 3.91 (dd, *J*<sub>1</sub> = 11.0 Hz, *J*<sub>2</sub> = 5.6 Hz, 1H), 3.76 (s, 3H), 3.33 (td, *J*<sub>1</sub> = 5.7 Hz, *J*<sub>2</sub> = 4.2 Hz, 1H), 2.92–2.86 (m, 1H), 2.74 (dd, *J*<sub>1</sub> = 5.0 Hz, *J*<sub>2</sub> = 2.7 Hz, 1H). HRMS (ESI-FT): Calcd. For [M + H]<sup>+</sup>, C<sub>10</sub>H<sub>13</sub>O<sub>3</sub><sup>+</sup>: 181.0859; Found: 181.0862.

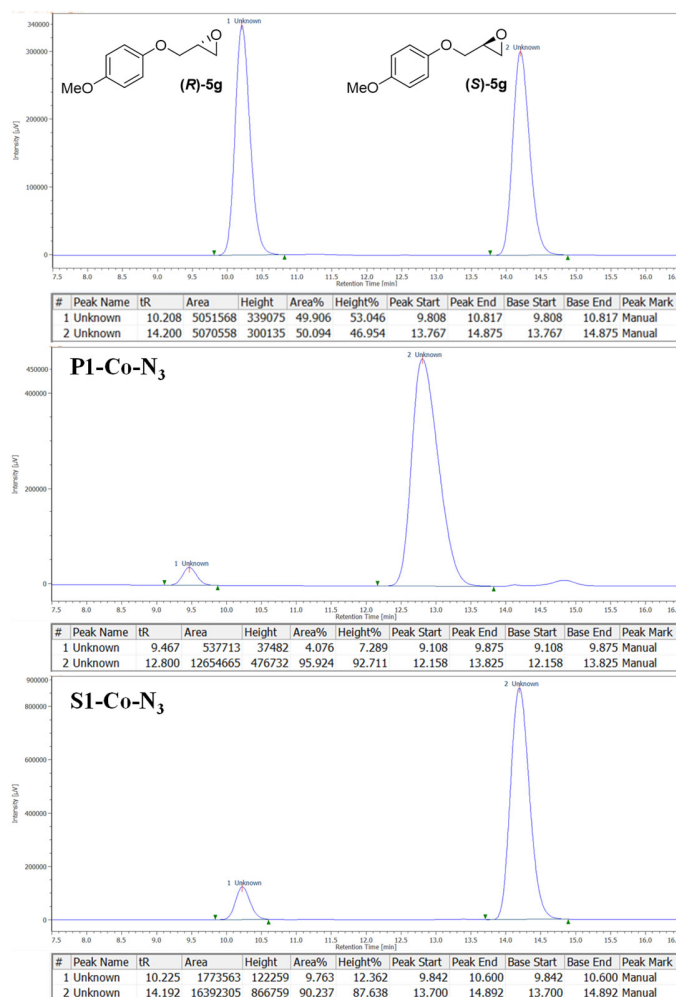

**Figure S16.** The merged HPLC curves of (±)-5g and the resolved ones by P1-Co-N<sub>3</sub> and S1-Co-N<sub>3</sub>, respectively.

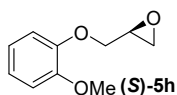

**(S)-5h**.<sup>[13]</sup> White solid; purification conditions: SiO<sub>2</sub>, petroleum ether/ethyl acetate, 6:1; 94 mg, 52% isolated yield. The *ee* 89% on HPLC (Chiralcel OD-H column): 70/30 *n*-hexane/*i*-PrOH; flow rate 1.0 mL/min; detection wavelength: 215 nm; retention time: 13.600 min (minor), 28.208 min (major). <sup>1</sup>H NMR (400 MHz, CDCl<sub>3</sub>): δ 6.99–6.84 (m, 4H), 4.23 (dd, *J*<sub>1</sub> = 11.4 Hz, *J*<sub>2</sub> = 3.5 Hz, 1H), 4.02 (dd, *J*<sub>1</sub> = 11.4 Hz, *J*<sub>2</sub> = 5.6 Hz, 1H), 3.85 (s, 3H), 3.42–3.33 (m, 1H), 2.91–2.84 (m, 1H), 2.72 (dd, *J*<sub>1</sub> = 5.0 Hz, *J*<sub>2</sub> = 2.6 Hz, 1H). HRMS (ESI-FT): Calcd. For [M + H]<sup>+</sup>, C<sub>10</sub>H<sub>13</sub>O<sub>3</sub><sup>+</sup>: 181.0859; Found: 181.0866.

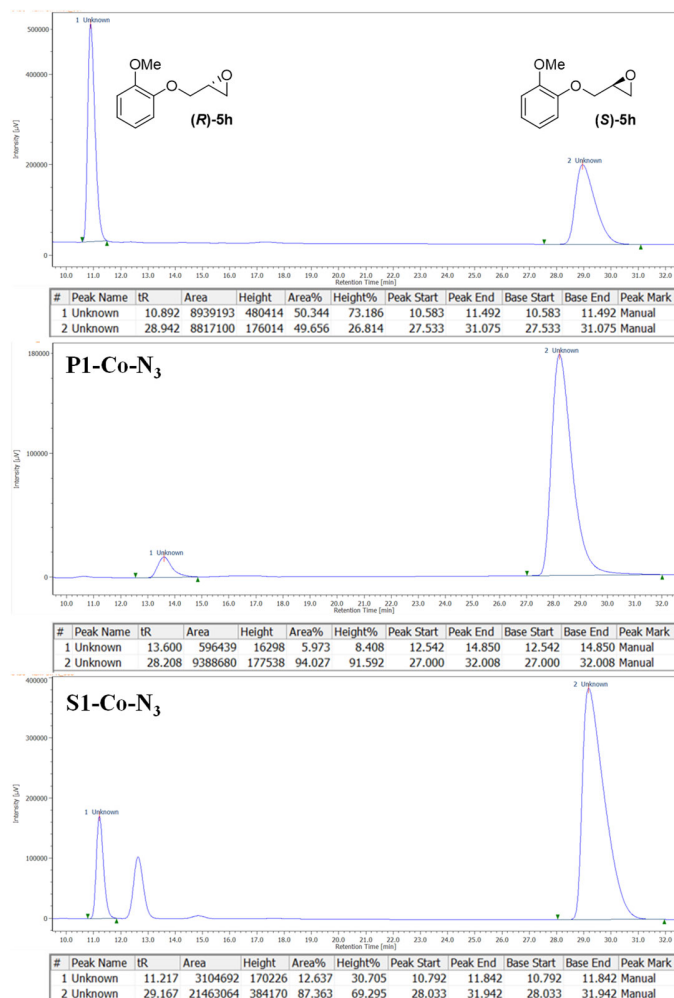

**Figure S17.** The merged HPLC curves of (±)-5h and the resolved ones by P1-Co-N<sub>3</sub> and S1-Co-N<sub>3</sub>, respectively.

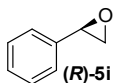

**(R)-5i.**[14] Colorless oil; purification conditions: SiO<sub>2</sub>, petroleum ether/ethyl acetate, 8:1; 67 mg, isolated yield: 56%. The *ee* value 79% on HPLC (Chiralcel AS-H column): 99/1 *n*-hexane/*i*-PrOH; flow rate 1.0 mL/min; detection wavelength: 220 nm; retention time: 7.408 min (major), 7.942 min (minor). <sup>1</sup>H NMR (400 MHz, CDCl<sub>3</sub>): δ 7.38–7.26 (m, 5H), 3.89–3.84 (m, 1H), 3.15 (dd, *J*<sub>1</sub> = 5.6 Hz, *J*<sub>2</sub> = 4.1 Hz, 1H), 2.81 (dd, *J*<sub>1</sub> = 5.5 Hz, *J*<sub>2</sub> = 2.6 Hz, 1H). HRMS (ESI-FT): Calcd. For [M + H]<sup>+</sup>, C<sub>8</sub>H<sub>9</sub>O<sup>+</sup>: 121.0575; Found: 121.0577.

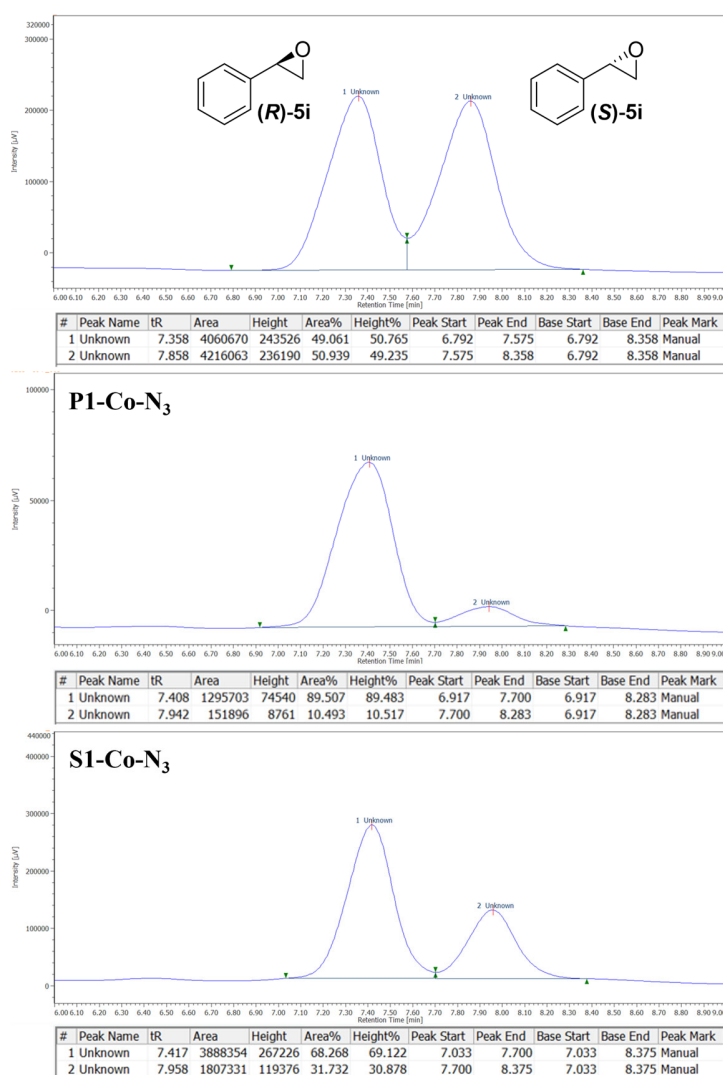

**Figure S18.** The merged HPLC curves of (±)-5i and the resolved ones by P1-Co-N<sub>3</sub> and S1-Co-N<sub>3</sub>, respectively.

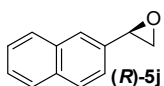

**(R)-5j**.<sup>[14]</sup> White solid; purification conditions: SiO<sub>2</sub>, petroleum ether/ethyl acetate, 8:1; 103 mg, isolated yield: 61%. The *ee* value 56% on HPLC (Chiralcel OZ-H column): 99/1 *n*-hexane/*i*-PrOH; flow rate 1.0 mL/min; detection wavelength: 220 nm; retention time: 7.808 min (major), 8.933 min (minor). <sup>1</sup>H NMR (600 MHz, CDCl<sub>3</sub>): δ 7.86–7.78 (m, 4H), 7.53–7.44 (m, 2H), 7.33 (dd, *J*<sub>1</sub> = 8.5 Hz, *J*<sub>2</sub> = 1.8 Hz, 1H), 4.04 (dd, *J*<sub>1</sub> = 4.1 Hz, *J*<sub>2</sub> = 2.5 Hz, 1H), 3.23 (dd, *J*<sub>1</sub> = 5.4 Hz, *J*<sub>2</sub> = 4.1 Hz, 1H), 2.91 (dd, *J*<sub>1</sub> = 5.4 Hz, *J*<sub>2</sub> = 2.6 Hz, 1H). HRMS (ESI-FT): Calcd. For [M + H]<sup>+</sup>, C<sub>12</sub>H<sub>11</sub>O<sup>+</sup>: 171.0732; Found: 171.0738.

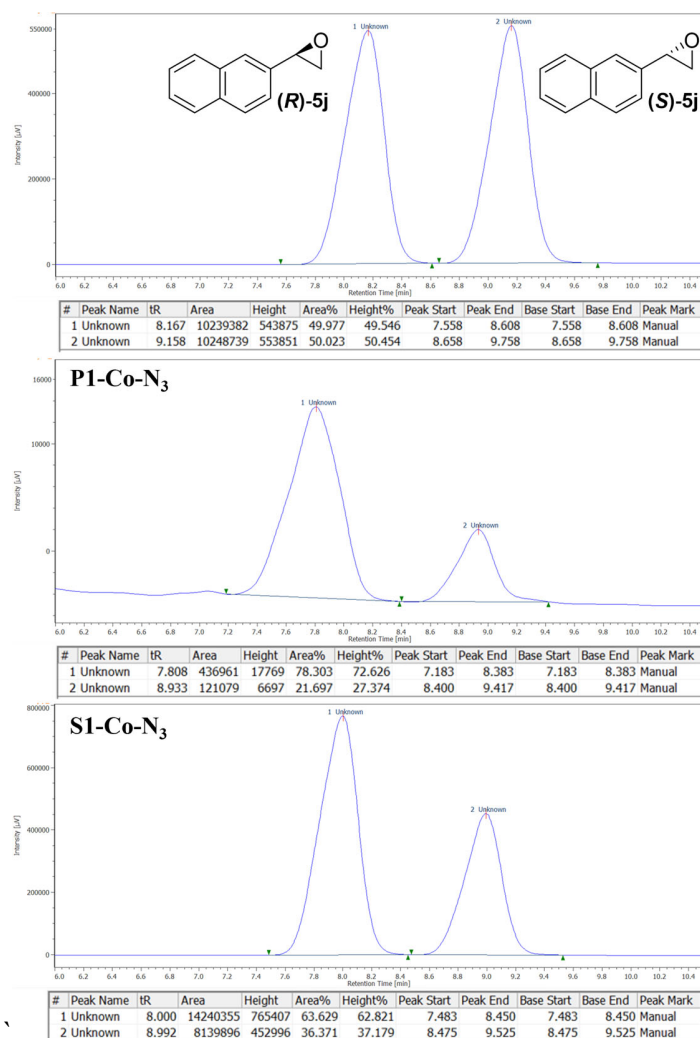

**Figure S19.** The merged HPLC curves of (±)-5i and the resolved ones by P1-Co-N<sub>3</sub> and S1-Co-N<sub>3</sub>, respectively.

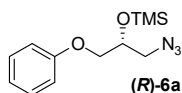

**(R)-6a.**[15] Colorless oil, purification conditions: SiO<sub>2</sub>, petroleum ether/ethyl acetate, 97:3; 97 mg, 47% isolated yield. The *ee* 99% on HPLC (Chiralcel OD-H column): 95/5 *n*-hexane/*i*-PrOH; flow rate 0.8 mL/min; detection wavelength: 220 nm; retention time: 5.375 min (minor), 6.450 min (major). <sup>1</sup>H NMR (600 MHz, CDCl<sub>3</sub>): δ 7.29 (dd, *J*<sub>1</sub> = 8.7 Hz, *J*<sub>2</sub> = 7.4 Hz, 2H), 6.97 (t, *J* = 7.3 Hz, 1H), 6.89 (dd, *J*<sub>1</sub> = 8.8 Hz, *J*<sub>2</sub> = 1.0 Hz, 2H), 4.18 (qd, *J*<sub>1</sub> = 6.0 Hz, *J*<sub>2</sub> = 3.8 Hz, 1H), 3.93 (d, *J* = 5.9 Hz, 2H), 3.42 (dd, *J*<sub>1</sub> = 12.6 Hz, *J*<sub>2</sub> = 3.8 Hz, 1H), 3.36 (dd, *J*<sub>1</sub> = 12.6 Hz, *J*<sub>2</sub> = 6.1 Hz, 1H), 0.21 (s, 9H). HRMS (ESI-FT): Calcd. For [M – H]<sup>–</sup>, C<sub>12</sub>H<sub>18</sub>N<sub>3</sub>O<sub>2</sub>Si<sup>–</sup>: 264.1162. Found: 264.1151.

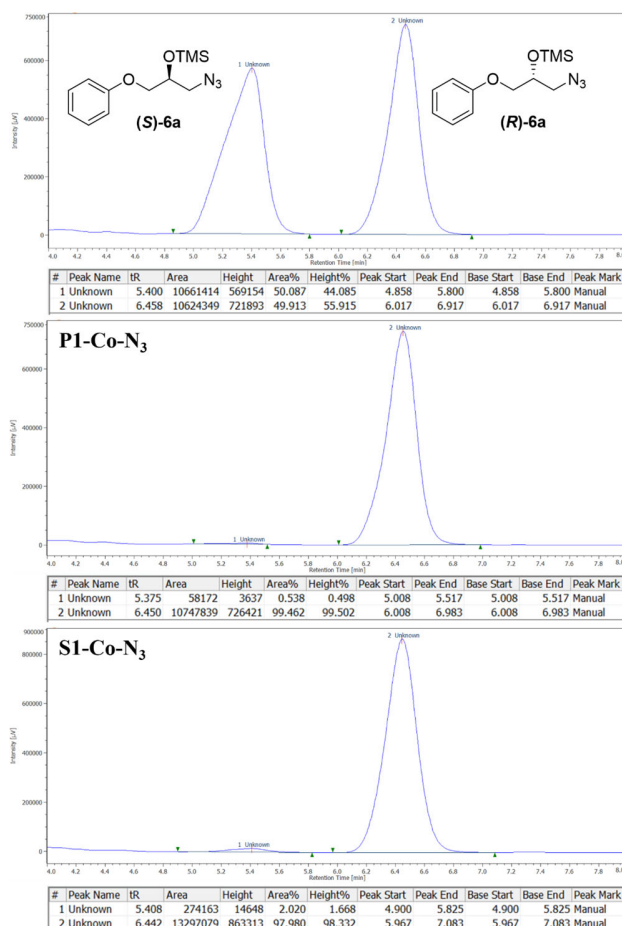

**Figure S20.** The merged HPLC curves of (±)-6a and the resolved ones by P1-Co-N<sub>3</sub> and S1-Co-N<sub>3</sub>, respectively.



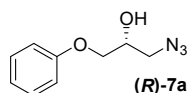

**(R)-7a.[16]** Colorless oil; purification conditions: SiO<sub>2</sub>, petroleum ether/ethyl acetate, 9:1; 63 mg, 42% isolated yield. The *ee* 99% on HPLC (Chiralcel OD-H column): 90/10 *n*-hexane/*i*-PrOH; flow rate 1.0 mL/min; detection wavelength: 220 nm; retention time: 12.875 min (major), 26.508 min (minor). <sup>1</sup>H NMR (600 MHz, CDCl<sub>3</sub>): δ 7.34–7.27 (m, 2H), 6.99 (td, *J*<sub>1</sub> = 7.4 Hz, *J*<sub>2</sub> = 1.1 Hz, 1H), 6.95–6.89 (m, 2H), 4.17 (dt, *J*<sub>1</sub> = 9.7 Hz, *J*<sub>2</sub> = 4.9 Hz, 1H), 4.06–3.98 (m, 2H), 3.53 (qd, *J*<sub>1</sub> = 13.1 Hz, *J*<sub>2</sub> = 5.4 Hz, 2H), 2.50 (d, *J* = 4.1 Hz, 1H). HRMS (ESI-FT): Calcd. For [M + H]<sup>+</sup>, C<sub>9</sub>H<sub>12</sub>N<sub>3</sub>O<sub>2</sub><sup>+</sup>: 193.0924; Found: 193.0926.

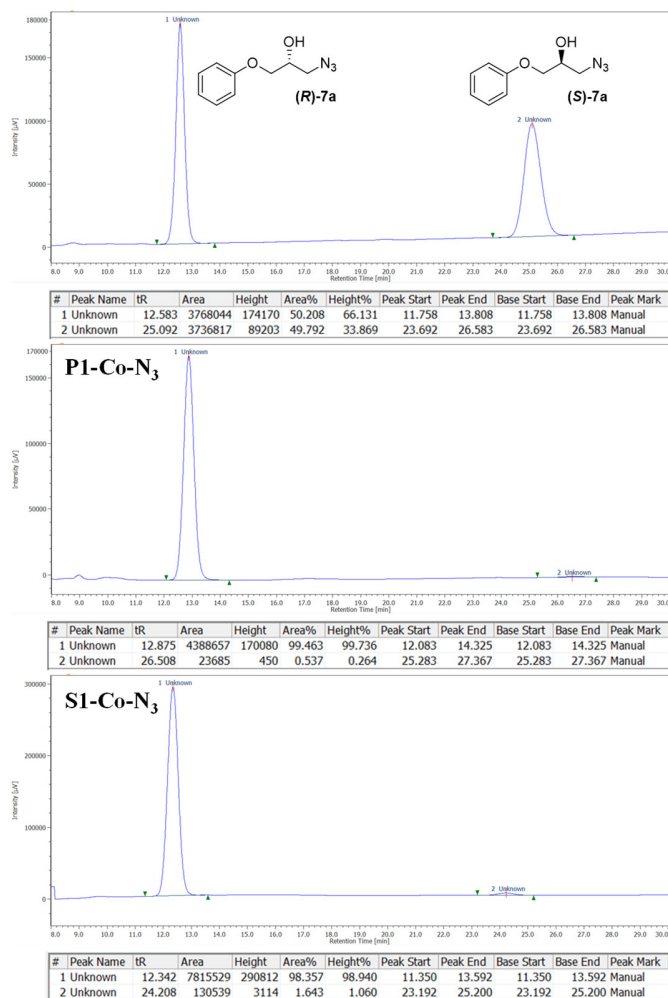

**Figure S21.** The merged HPLC curves of (±)-7a and the resolved ones by P1-Co-N<sub>3</sub> and S1-Co-N<sub>3</sub>, respectively.

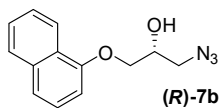

**(R)-7b.**[16] Colorless oil; purification conditions: SiO<sub>2</sub>, petroleum ether/ethyl acetate, 9:1; 105 mg, 43% isolated yield. The *ee* 97% on HPLC (Chiralcel OD-H column): 90/10 *n*-hexane/*i*-PrOH; flow rate 1.0 mL/min; detection wavelength: 220 nm; retention time: 31.125 min (major), 33.525 min (minor). <sup>1</sup>H NMR (600 MHz, CDCl<sub>3</sub>): δ 8.21 (dd, *J*<sub>1</sub> = 8.4 Hz, *J*<sub>2</sub> = 1.3 Hz, 1H), 7.82 (dd, *J*<sub>1</sub> = 7.0 Hz, *J*<sub>2</sub> = 2.5 Hz, 1H), 7.54–7.45 (m, 3H), 7.38 (t, *J* = 7.9 Hz, 1H), 6.84 (d, *J* = 7.6 Hz, 1H), 4.34 (dq, *J*<sub>1</sub> = 10.6, *J*<sub>2</sub> = 5.3 Hz, 1H), 4.25–4.17 (m, 2H), 3.70–3.59 (m, 2H), 2.53 (d, *J* = 5.3 Hz, 1H). HRMS (ESI-FT): Calcd. For [M + H]<sup>+</sup>, C<sub>13</sub>H<sub>14</sub>N<sub>3</sub>O<sub>2</sub><sup>+</sup>: 244.1081; Found: 244.1078.

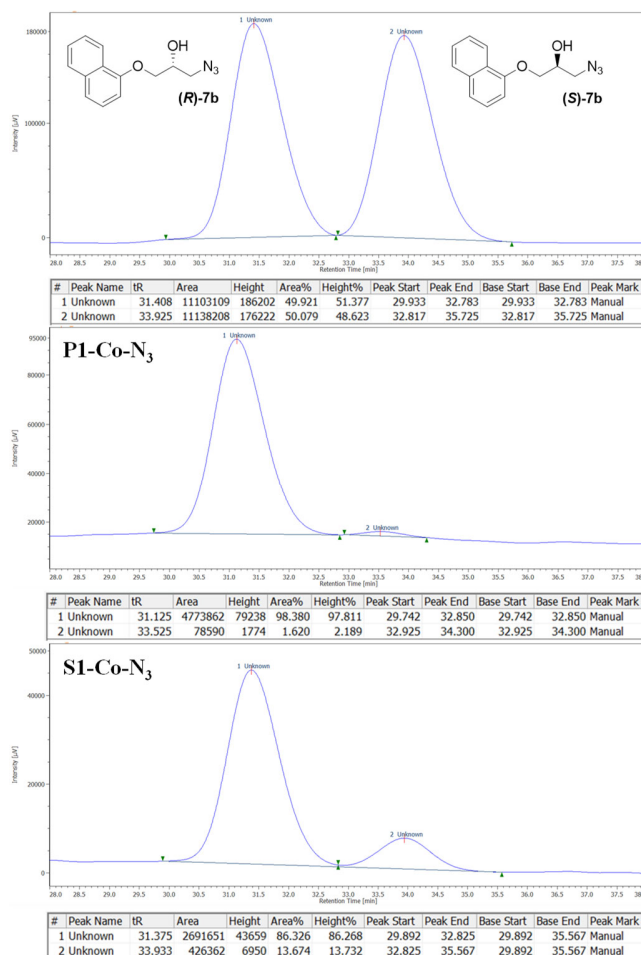

**Figure S22.** The merged HPLC curves of (±)-7b and the resolved ones by P1-Co-N<sub>3</sub> and S1-Co-N<sub>3</sub>, respectively.

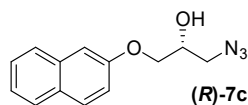

**(R)-7c.**[17] White solid; purification conditions: SiO<sub>2</sub>, petroleum ether/ethyl acetate, 9:1; 102 mg, 42% isolated yield. The *ee* 94% on HPLC (Chiralcel OD-H column): 90/10 *n*-hexane/*i*-PrOH; flow rate 1.0 mL/min; detection wavelength: 220 nm; retention time: 20.367 min (major), 25.408 min (minor). <sup>1</sup>H NMR (600 MHz, CDCl<sub>3</sub>): δ 7.80–7.71 (m, 3H), 7.49–7.42 (m, 1H), 7.40–7.33 (m, 1H), 7.19–7.14 (m, 2H), 4.24 (dq, *J*<sub>1</sub> = 9.7 Hz, *J*<sub>2</sub> = 5.0 Hz, 1H), 4.18–4.11 (m, 2H), 3.58 (qd, *J*<sub>1</sub> = 12.7 Hz, *J*<sub>2</sub> = 5.3 Hz, 2H), 2.53 (d, *J* = 4.7 Hz, 1H). HRMS (ESI-FT): Calcd. For [M + H]<sup>+</sup>, C<sub>13</sub>H<sub>14</sub>N<sub>3</sub>O<sub>2</sub><sup>+</sup>: 244.1081; Found: 244.1080.

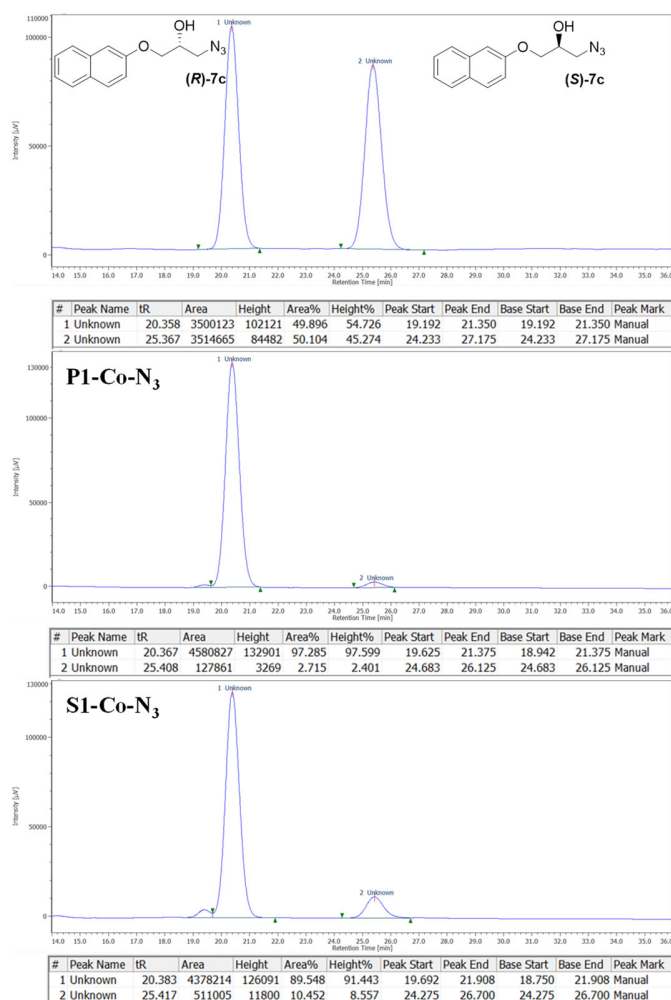

**Figure S23.** The merged HPLC curves of (±)-7c and the resolved ones by P1-Co-N<sub>3</sub> and S1-Co-N<sub>3</sub>, respectively.

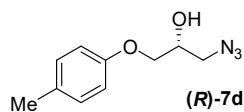

**(R)-7d.[18]** Colorless oil, purification conditions: SiO<sub>2</sub>, petroleum ether/ethyl acetate, 8:1; 72 mg, 44% isolated yield. The *ee* 97% on HPLC (Chiralcel OD-H column): 80/20 *n*-hexane/*i*-PrOH; flow rate 0.8 mL/min; detection wavelength: 220 nm; retention time: 17.117 min (major), 18.958 min (minor). <sup>1</sup>H NMR (600 MHz, CDCl<sub>3</sub>): δ 7.10 (d, *J* = 8.3 Hz, 2H), 6.88–6.76 (m, 2H), 4.18–4.13 (m, 1H), 4.02–3.95 (m, 2H), 3.52 (qd, *J*<sub>1</sub> = 12.6 Hz, *J*<sub>2</sub> = 5.4 Hz, 2H), 2.58 (d, *J* = 4.5 Hz, 1H), 2.30 (s, 3H). MS (ESI): Calcd. For [M + H]<sup>+</sup>, C<sub>10</sub>H<sub>14</sub>N<sub>3</sub>O<sub>2</sub><sup>+</sup>: 208.11; Found: 208.11.

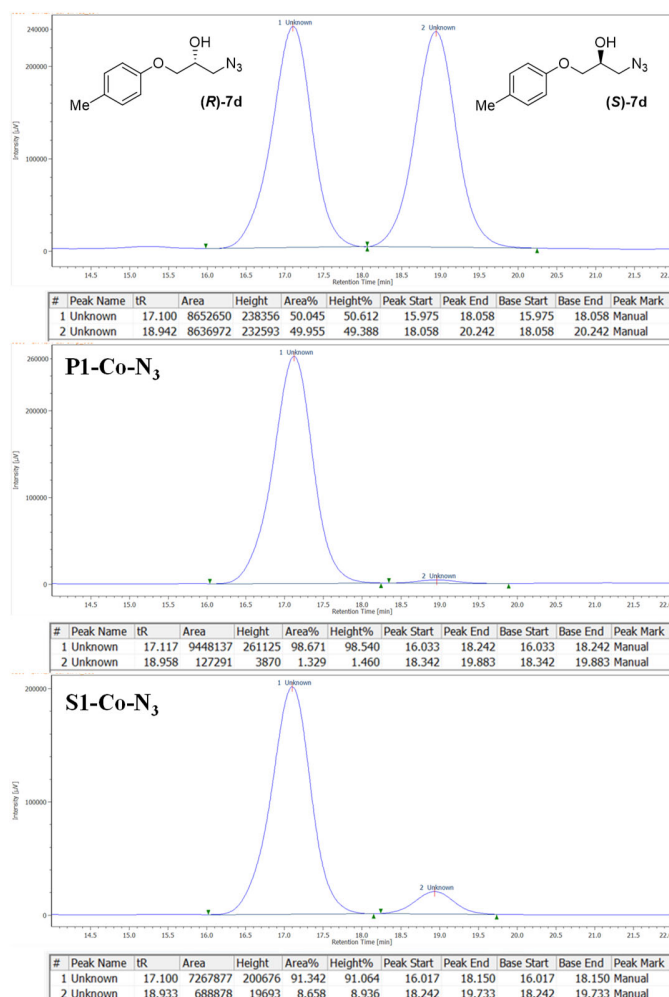

**Figure S24.** The merged HPLC curves of (±)-7d and the resolved ones by P1-Co-N<sub>3</sub> and S1-Co-N<sub>3</sub>, respectively.

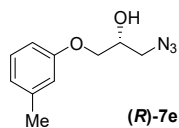

**(R)-7e.[18]** Colorless oil; purification conditions: SiO<sub>2</sub>, petroleum ether/ethyl acetate, 8:1; 69 mg, 42% isolated yield. The *ee* 97% on HPLC (Chiralcel OD-H column): 80/20 *n*-hexane/*i*-PrOH; flow rate 0.8 mL/min; detection wavelength: 220 nm; retention time: 13.617 min (major), 15.192 min (minor). <sup>1</sup>H NMR (600 MHz, CDCl<sub>3</sub>): δ 7.19 (t, *J* = 7.8 Hz, 1H), 6.82 (d, *J* = 7.5 Hz, 1H), 6.76–6.70 (m, 2H), 4.17 (h, *J* = 5.2 Hz, 1H), 4.04–3.98 (m, 2H), 3.52 (qd, *J*<sub>1</sub> = 12.7 Hz, *J*<sub>2</sub> = 5.4 Hz, 2H), 2.60 (d, *J* = 5.0 Hz, 1H), 2.34 (s, 3H). MS (ESI): Calcd. For [M + H]<sup>+</sup>, C<sub>10</sub>H<sub>14</sub>N<sub>3</sub>O<sub>2</sub><sup>+</sup>: 208.11; Found: 208.11.

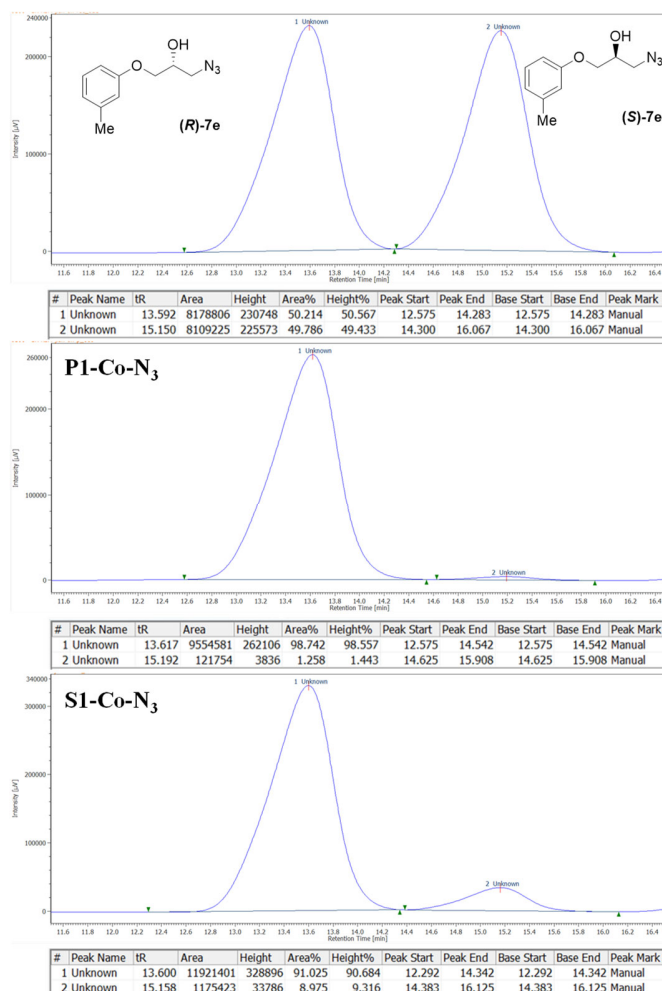

**Figure S25.** The merged HPLC curves of (±)-7e and the resolved ones by P1-Co-N<sub>3</sub> and S1-Co-N<sub>3</sub>, respectively.

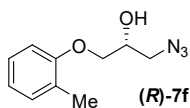

**(R)-7f.[18]** Colorless oil; purification conditions: SiO<sub>2</sub>, petroleum ether/ethyl acetate, 8:1; 66 mg, 32% isolated yield. The *ee* 96% on HPLC (Chiralcel OD-H column): 80/20 *n*-hexane/*i*-PrOH; flow rate 0.8 mL/min; detection wavelength: 220 nm; retention time: 6.592 min (major), 7.342 min (minor). <sup>1</sup>H NMR (600 MHz, CDCl<sub>3</sub>): δ 7.20 – 7.15 (m, 2H), 6.92 (dd, *J*<sub>1</sub> = 8.1 Hz, *J*<sub>2</sub> = 6.6 Hz, 1H), 6.83 (d, *J* = 8.0 Hz, 1H), 4.20 (h, *J* = 5.1 Hz, 1H), 4.03 (d, *J* = 4.2 Hz, 2H), 3.55 (qd, *J*<sub>1</sub> = 12.6 Hz, *J*<sub>2</sub> = 6.0 Hz, 2H), 2.64 (d, *J* = 5.1 Hz, 1H), 2.25 (s, 3H). HRMS (ESI-FT): Calcd. For [M + H]<sup>+</sup>, C<sub>10</sub>H<sub>14</sub>N<sub>3</sub>O<sub>2</sub><sup>+</sup>: 208.1081; Found: 208.1084.

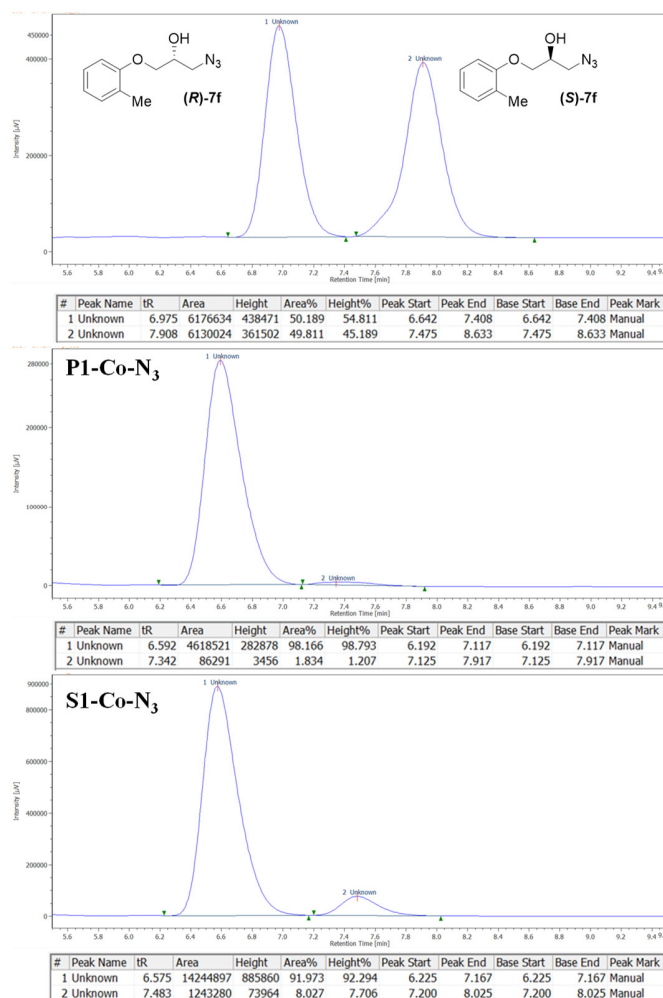

**Figure S26.** The merged HPLC curves of (±)-7f and the resolved ones by P1-Co-N<sub>3</sub> and S1-Co-N<sub>3</sub>, respectively.

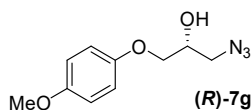

**(R)-7g.[19]** White solid; purification conditions: SiO<sub>2</sub>, petroleum ether/ethyl acetate, 4:1; 82 mg, 37% isolated yield. The *ee* 97% on HPLC (Chiralcel OD-H column): 85/15 *n*-hexane/*i*-PrOH; flow rate 0.5 mL/min; detection wavelength: 220 nm; retention time: 21.125 min (major), 35.008 min (minor). <sup>1</sup>H NMR (600 MHz, CDCl<sub>3</sub>): δ 6.87–6.81 (m, 4H), 4.14 (h, *J* = 5.1 Hz, 1H), 4.00–3.92 (m, 2H), 3.77 (s, 3H), 3.50 (qd, *J*<sub>1</sub> = 12.6 Hz, *J*<sub>2</sub> = 5.4 Hz, 2H), 2.64 (d, *J* = 5.1 Hz, 1H). HRMS (ESI-FT): Calcd. For [M + H]<sup>+</sup>, C<sub>10</sub>H<sub>14</sub>N<sub>3</sub>O<sub>3</sub><sup>+</sup>: 224.1030; Found: 224.1031.

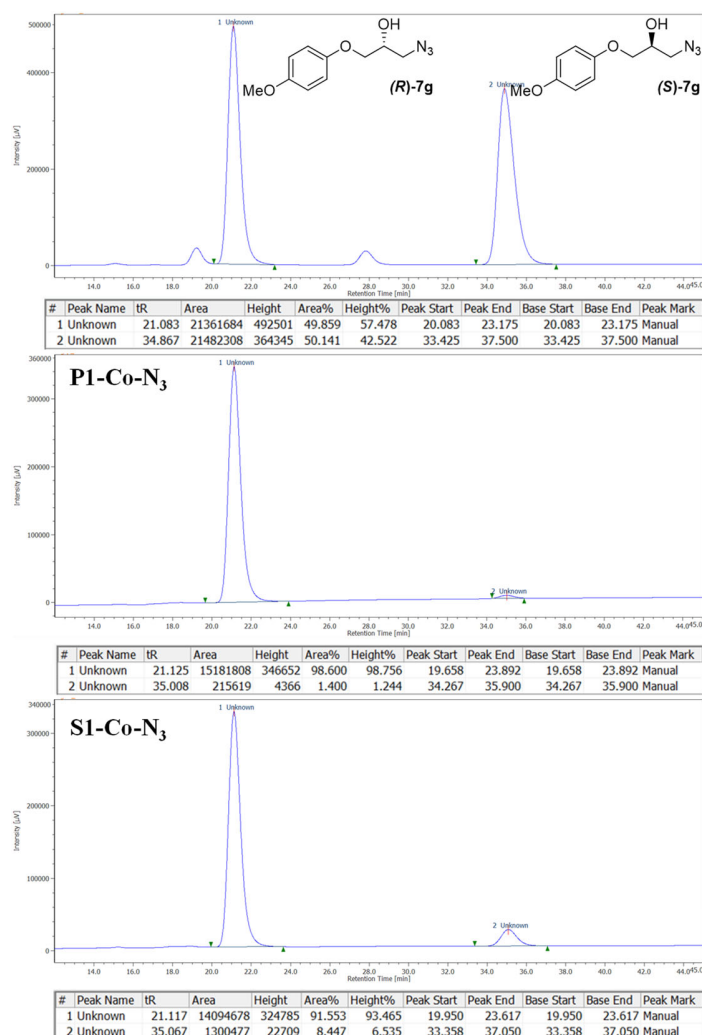

**Figure S27.** The merged HPLC curves of (±)-7g and the resolved ones by P1-Co-N<sub>3</sub> and S1-Co-N<sub>3</sub>, respectively.

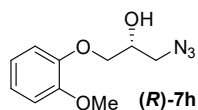

**(R)-7h.[20]** White solid; purification conditions: SiO<sub>2</sub>, petroleum ether/ethyl acetate, 4:1; 77 mg, 35% isolated yield. The *ee* 90% on HPLC (Chiralcel OD-H column): 85/15 *n*-hexane/*i*-PrOH; flow rate 0.5 mL/min; detection wavelength: 220 nm; retention time: 21.817 min (major), 49.533 min (minor). <sup>1</sup>H NMR (600 MHz, CDCl<sub>3</sub>): δ 7.03–6.94 (m, 2H), 6.93–6.88 (m, 2H), 4.16 (d, *J* = 6.0 Hz, 1H), 4.10–4.00 (m, 2H), 3.87 (d, *J* = 1.9 Hz, 3H), 3.55–3.44 (m, 2H), 3.21 (d, *J* = 4.8 Hz, 1H). HRMS (ESI-FT): Calcd. For [M + H]<sup>+</sup>, C<sub>10</sub>H<sub>14</sub>N<sub>3</sub>O<sub>3</sub><sup>+</sup>: 224.1030; Found: 224.1032.

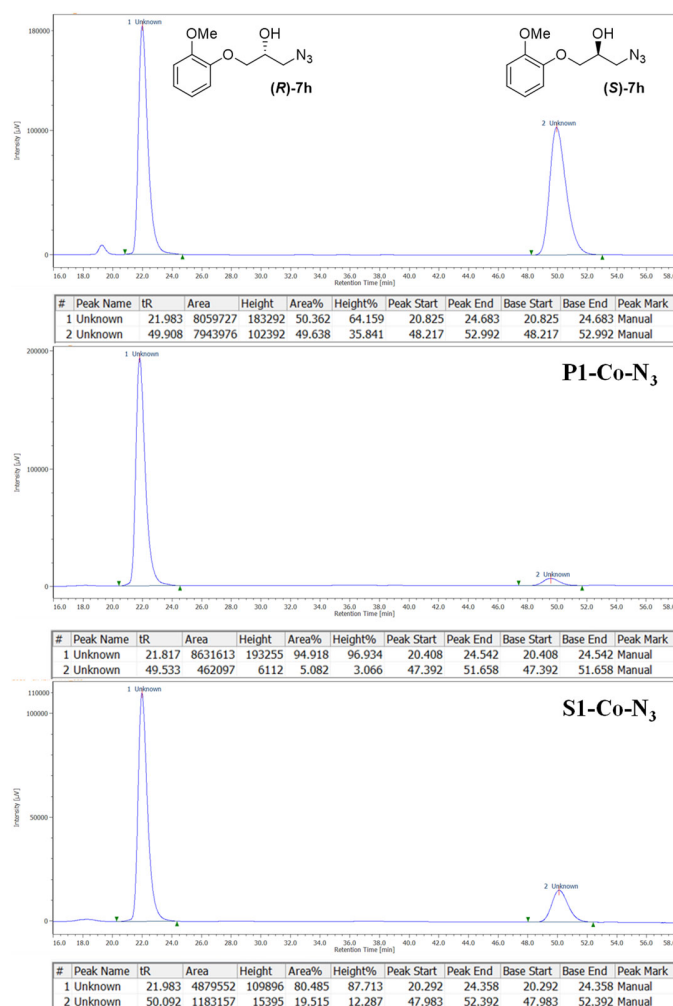

**Figure S28.** The merged HPLC curves of (±)-7h and the resolved ones by P1-Co-N<sub>3</sub> and S1-Co-N<sub>3</sub>, respectively.



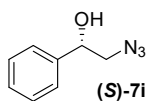

**(S)-7i.[21]** Colorless oil; purification conditions: SiO<sub>2</sub>, petroleum ether/ethyl acetate, 10:1; 63 mg, 39% isolated yield. The *ee* 99% on HPLC (Chiralcel OD-H column): 95/5 *n*-hexane/*i*-PrOH; flow rate 0.5 mL/min; detection wavelength: 210 nm; retention time: 33.108 min (minor), 35.908 min (major). <sup>1</sup>H NMR (600 MHz, CDCl<sub>3</sub>): δ 7.38 (d, *J* = 4.3 Hz, 4H), 7.33 (q, *J* = 4.5 Hz, 1H), 4.89 (dd, *J*<sub>1</sub> = 8.3 Hz, *J*<sub>2</sub> = 3.8 Hz, 1H), 3.53–3.42 (m, 2H), 2.35 (s, 1H). HRMS (ESI-FT): Calcd. For [M + H]<sup>+</sup>, C<sub>8</sub>H<sub>10</sub>N<sub>3</sub>O<sup>+</sup>: 164.0818; Found: 164.0820.

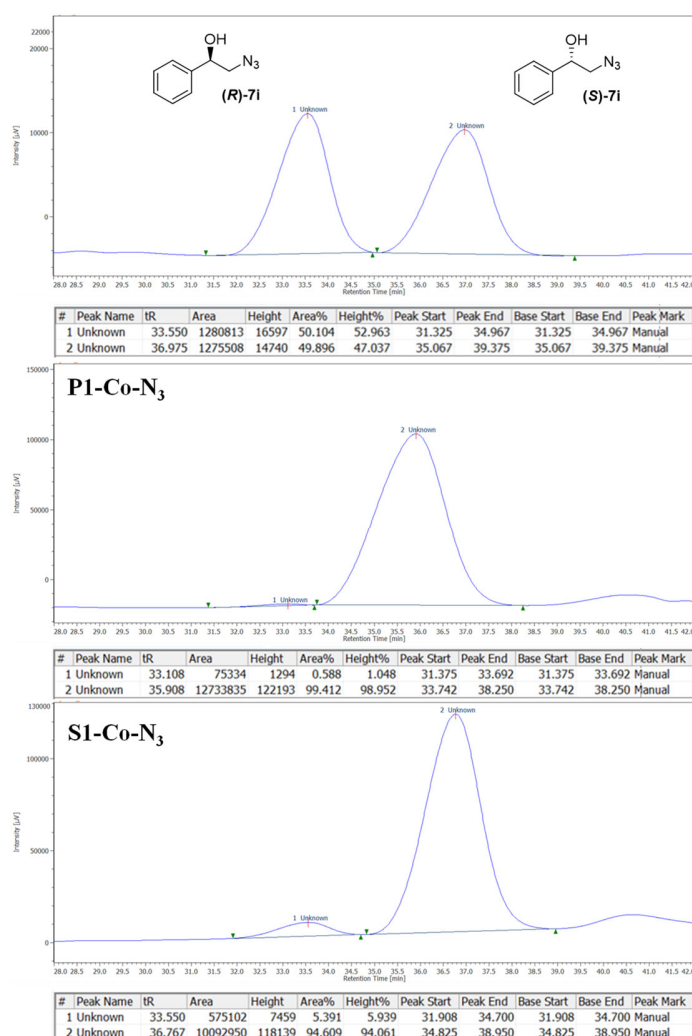

**Figure S29.** The merged HPLC curves of (±)-7i and the resolved ones by P1-Co-N<sub>3</sub> and S1-Co-N<sub>3</sub>, respectively.

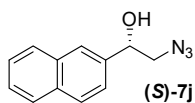

(S)-7j.[22] White solid; purification conditions: SiO<sub>2</sub>, petroleum ether/ethyl acetate, 10:1; 78 mg, 37% isolated yield. The *ee* 96% on HPLC (Chiralcel OD-H column): 90/10 *n*-hexane/*i*-PrOH; flow rate 0.5 mL/min; detection wavelength: 220 nm; retention time: 20.817 min (minor), 24.908 min (major). <sup>1</sup>H NMR (600 MHz, CDCl<sub>3</sub>): δ 7.93–7.80 (m, 4H), 7.56–7.44 (m, 3H), 5.06 (dt, *J*<sub>1</sub> = 7.3 Hz, *J*<sub>2</sub> = 3.3 Hz, 1H), 3.64–3.49 (m, 2H), 2.46 (s, 1H). HRMS (ESI-FT): Calcd. For [M + H]<sup>+</sup>, C<sub>13</sub>H<sub>14</sub>N<sub>3</sub>O<sub>2</sub><sup>+</sup>: 214.0975; Found: 214.0977.

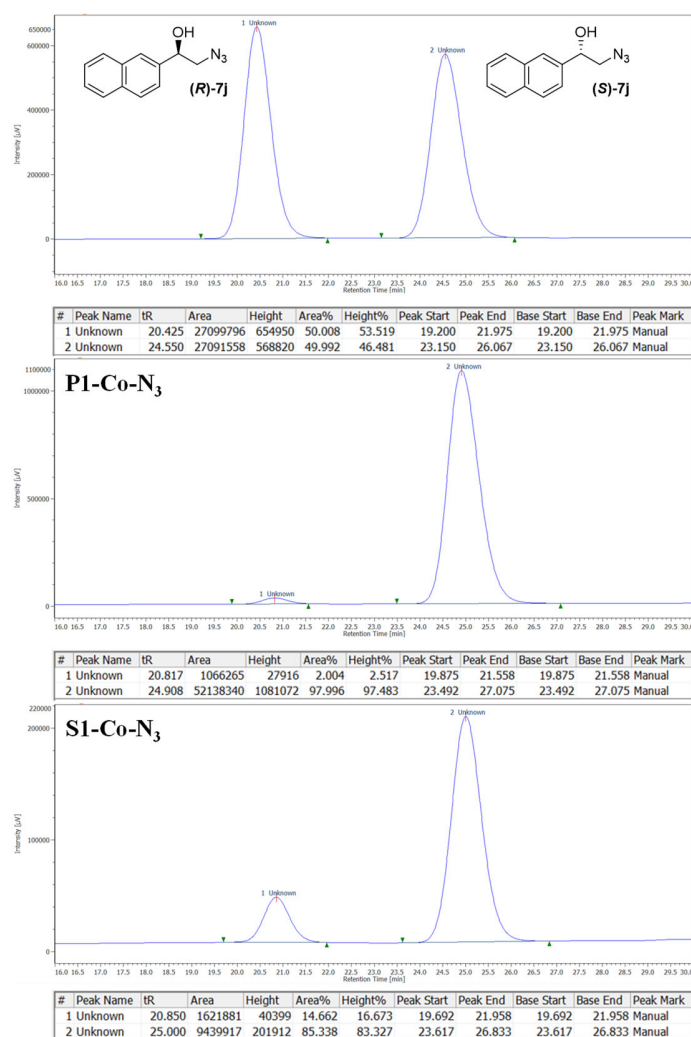

Figure S30. The merged HPLC curves of (±)-7j and the resolved ones by P1-Co-N<sub>3</sub> and S1-Co-N<sub>3</sub>, respectively.

## SI3.2 The Evaluation of Catalytic Activity and Recycle Ability

### Recycle Experiment

In a 10 mL Schlenk flask, ( $\pm$ )-**5a** (150 mg, 1.0 mmol) and **P1-Co-N<sub>3</sub>** (4.4 mg, 0.006 mmol, 0.6 mol %) were dissolved in dry MeO'Bu (0.4 mL, 2.5 M) under an N<sub>2</sub> atmosphere. The solution was stirred at 0 °C for 0.5 h. After TMSN<sub>3</sub> (66  $\mu$ L, 0.5 mmol, 0.5 eq) was added, the resulting solution was further stirred at 0 °C for 12 h. Then the reaction solution was concentrated, precipitated with *n*-hexane (2 mL). Polymer-supported catalyst **P1-Co-N<sub>3</sub>** was separated by centrifugation and washed with small amount of methanol for three times and subjected to the next catalytic cycle. The combined supernatant was concentrated, and the residue was purified by rapid column chromatography (SiO<sub>2</sub>, petroleum ether/ethyl acetate, 19:1) to determine the isolated yields and the *ee* values of (**S**)-**5a** and (**R**)-**6a**. In our treatment, the catalytic processes were consecutively repeated for 8 times.

**Table S2.** Recycle Experiment Results of **5a** to **6a**<sup>a</sup>.

| Recycle time | Yield of ( <b>S</b> )- <b>5a</b> (%) <sup>b</sup> | <i>ee</i> of ( <b>S</b> )- <b>5a</b> <sup>c</sup> | Yield of ( <b>R</b> )- <b>6a</b> (%) <sup>b</sup> | <i>ee</i> of ( <b>R</b> )- <b>6a</b> <sup>c</sup> |
|--------------|---------------------------------------------------|---------------------------------------------------|---------------------------------------------------|---------------------------------------------------|
| 1            | 50                                                | 99                                                | 47                                                | >99                                               |
| 2            | 51                                                | 99                                                | 45                                                | 99                                                |
| 3            | 52                                                | 99                                                | 44                                                | 99                                                |
| 4            | 52                                                | 99                                                | 44                                                | 99                                                |
| 5            | 53                                                | 99                                                | 42                                                | 98                                                |
| 6            | 53                                                | 99                                                | 42                                                | 98                                                |
| 7            | 54                                                | 98                                                | 40                                                | 98                                                |
| 8            | 54                                                | 98                                                | 40                                                | 98                                                |

<sup>a</sup> Reaction conditions: [( $\pm$ )-**5a**] = 2.50 M, [TMSN<sub>3</sub>] = 1.25 M. <sup>b</sup> Isolated yield according to 50% theoretical yield. <sup>c</sup> The *ee*% value was determined by chiral HPLC column.

### Experiments on the relationship between *M<sub>n</sub>*-*ee* and *M<sub>n</sub>*-yield

In five 10 mL Schlenk flask, ( $\pm$ )-**5a** (150 mg, 1.0 mmol), **P1-Co-N<sub>3</sub>** with different *M<sub>n</sub>*s (*M<sub>n</sub>* = 35.7, 70.9, 143.3, 199.6, and 289.7 kDa, 4.4 mg, 0.006 mmol, 0.6 mol %) were dissolved in dry MeO'Bu (0.4 mL, 2.5 M) under an N<sub>2</sub> atmosphere. The solution was stirred at 0 °C for 0.5 h and subsequently TMSN<sub>3</sub> (66  $\mu$ L, 0.5 mmol, 0.5 eq) was added, then it was further stirred at 0 °C for 12 h. Next, the reaction solution was concentrated. The residue was subjected to rapid column chromatography to afford pure (**S**)-**5a** and (**R**)-**6a**.

**Table S3.** *M<sub>n</sub>*-*ee* and *M<sub>n</sub>*-yield Relationship Experiment Results of **5a** to **6a**<sup>a</sup>.

| Entry | $M_n$ (kDa) | Yield of ( <b>R</b> )- <b>5a</b> (%) <sup>b</sup> | $ee_{(S)-5a}$ <sup>c</sup> | Yield of ( <b>S</b> )- <b>6a</b> (%) <sup>b</sup> | $ee_{(R)-6a}$ <sup>c</sup> |
|-------|-------------|---------------------------------------------------|----------------------------|---------------------------------------------------|----------------------------|
| 1     | 35.7        | 60                                                | 26                         | 36                                                | 33                         |
| 2     | 70.9        | 57                                                | 46                         | 40                                                | 51                         |
| 3     | 143.3       | 54                                                | 75                         | 44                                                | 78                         |
| 4     | 199.6       | 52                                                | 99                         | 47                                                | 99.5                       |
| 5     | 289.7       | 52                                                | 98                         | 46                                                | 99                         |

<sup>a</sup>Reaction conditions: [(±)-**5a**] = 2.50 M, [TMSN<sub>3</sub>] = 1.25 M. <sup>b</sup>The isolated yield was determined according to the theoretical yield of one enantiomer. <sup>c</sup>The  $ee$  values were determined by chiral HPLC column.

### Catalyst Loading Experiment

In five 10 mL Schlenk flasks, to dry MeO<sup>t</sup>Bu (0.4 mL, 2.5 M) were added (*rac*)-**5a** (150 mg, 1.0 mmol) and **P1-Co-N<sub>3</sub>**/**S1-Co-N<sub>3</sub>** with different catalyst loadings (0.1, 0.3, 0.6, 0.8, and 1.0 mol %) under an N<sub>2</sub> atmosphere. The solution was stirred at 0 °C for 0.5 h and TMSN<sub>3</sub> (66 μL, 0.5 mmol, 0.5 eq) was added, then it was further stirred at 0 °C for 12 h. Next, the reaction solution was concentrated, and the residue was subjected to rapid column chromatography (SiO<sub>2</sub>, petroleum ether/ethyl acetate, 19:1) to afford pure (**S**)-**5a** and (**R**)-**6a**.

**Table S4.** Summary of Catalyst Loading Experiment of **5a** to **6a**<sup>a</sup>.

| Entry | Cat. loading (mol %) | TON by <b>P1-Co-N<sub>3</sub></b> <sup>b</sup> | TON by <b>S1-Co-N<sub>3</sub></b> <sup>b</sup> | $ee_{(S)-6a}$ by <b>P1-Co-N<sub>3</sub></b> <sup>c</sup> | $ee_{(S)-6a}$ by <b>S1-Co-N<sub>3</sub></b> <sup>c</sup> |
|-------|----------------------|------------------------------------------------|------------------------------------------------|----------------------------------------------------------|----------------------------------------------------------|
| 1     | 0.1                  | 260                                            | 50                                             | 60                                                       | 51                                                       |
| 2     | 0.3                  | 280                                            | 62                                             | 78                                                       | 68                                                       |
| 3     | 0.6                  | 305                                            | 76                                             | 99.5                                                     | 91                                                       |
| 4     | 0.8                  | 304                                            | 82                                             | 99.5                                                     | 93                                                       |
| 5     | 1.0                  | 304                                            | 85                                             | 99.5                                                     | 94                                                       |

<sup>a</sup>Reaction conditions: [(*rac*)-**5a**] = 2.50 M, [TMSN<sub>3</sub>] = 1.25 M. <sup>b</sup>The TON values were calculated according to TMSN<sub>3</sub>. <sup>c</sup>The  $ee$  values were determined by chiral HPLC column.

### SI3.3 The Application to Pharmaceutical Synthesis.

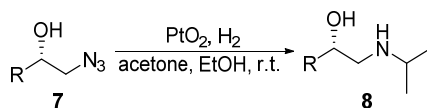

**General Procedure for the synthesis of  $\beta$ -amino alcohol derivatives.**[23] To a solution of **7** (8.0 mmol) and acetone (12.0 mmol) in ethanol (100 mL) was added PtO<sub>2</sub> powder (0.88 g, 4.0 mmol). The mixture was stirred vigorously, and H<sub>2</sub> was continuously purged in *via* a balloon at ambient temperature for 20 h. Subsequently the solid was filtered off through celite and washed with small amount of ethanol for three times. Finally, the combined filtrate was concentrated in vacuo to give the product.

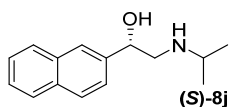

**(S)-8j ((S)-pronethalol).**[23] White solid, 1.20 g, 71% isolated yield. <sup>1</sup>H NMR (400 MHz, CDCl<sub>3</sub>):  $\delta$  7.93–7.78 (m, 4H), 7.50–7.45 (m, 3H), 4.91 (dd,  $J_1 = 8.8$  Hz,  $J_2 = 3.7$  Hz, 1H), 3.07 (dd,  $J_1 = 12.1$  Hz,  $J_2 = 3.7$  Hz, 1H), 2.93 (h,  $J = 6.2$  Hz, 1H), 2.79 (dd,  $J_1 = 12.1$  Hz,  $J_2 = 8.8$  Hz, 1H), 2.62 (s, 1H), 1.28 (d,  $J = 23.4$  Hz, 1H), 1.13 (dd,  $J_1 = 6.3$  Hz,  $J_2 = 3.5$  Hz, 6H). HRMS (ESI-FT): Calcd. For [M + H]<sup>+</sup>, C<sub>15</sub>H<sub>20</sub>NO<sup>+</sup>: 230.1539. Found: 230.1540.

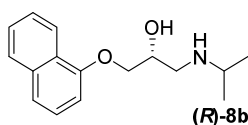

**(R)-8b ((R)-propranolol).**[24] White solid, 1.32 g, 68% isolated yield. <sup>1</sup>H NMR (600 MHz, CDCl<sub>3</sub>):  $\delta$  8.31–8.22 (m, 1H), 7.81 (dd,  $J_1 = 5.9$  Hz,  $J_2 = 2.2$  Hz, 1H), 7.59–7.42 (m, 3H), 7.37 (t,  $J = 7.9$  Hz, 1H), 6.82 (d,  $J = 8.6$  Hz, 1H), 4.26–4.08 (m, 3H), 3.11–2.72 (m, 5H), 1.12 (d,  $J = 6.3$  Hz, 6H). HRMS (ESI-FT): Calcd. For [M + H]<sup>+</sup>, C<sub>16</sub>H<sub>22</sub>NO<sub>2</sub><sup>+</sup>: 260.1648. Found: 260.1651.

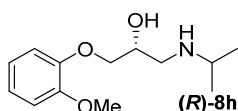

**(R)-8h.**[25] White solid, 1.22 g, 74% isolated yield. <sup>1</sup>H NMR (600 MHz, CDCl<sub>3</sub>):  $\delta$  7.08–6.79 (m, 4H), 4.19–3.92 (m, 3H), 3.85 (s, 3H), 3.01–2.77 (m, 3H), 1.12 (d,  $J = 6.3$  Hz, 6H). HRMS (ESI-FT): Calcd. For [M + H]<sup>+</sup>, C<sub>13</sub>H<sub>22</sub>NO<sub>3</sub><sup>+</sup>: 240.1597. Found: 240.1596.

## SI4 NMR Spectra of Organic Compounds and Polymers.

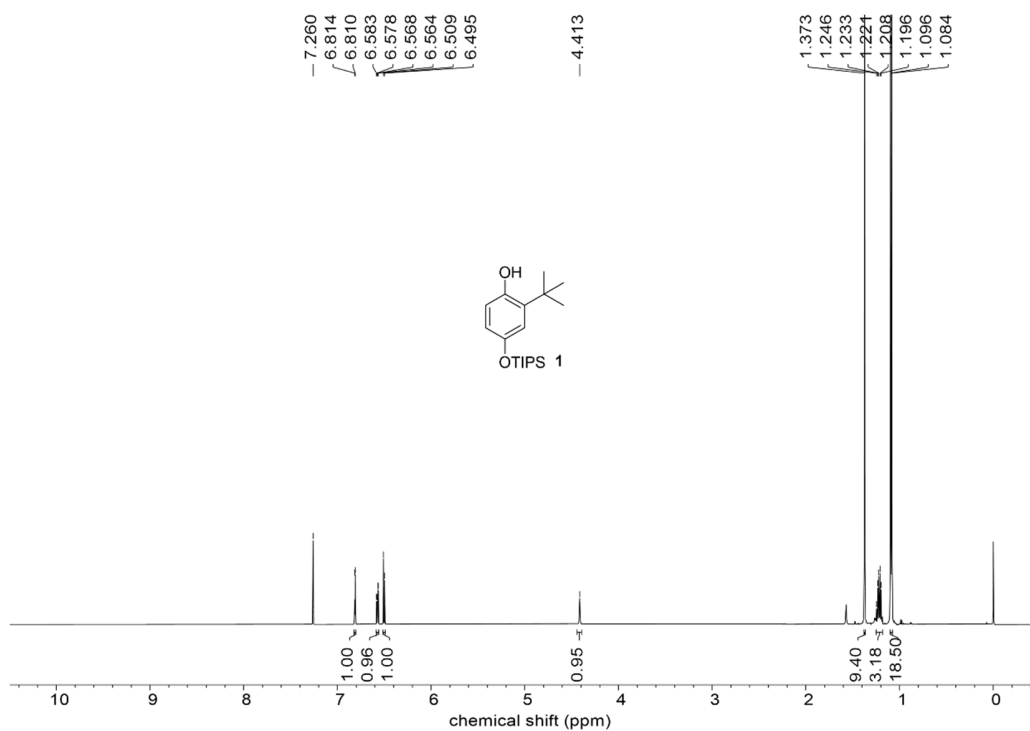

Figure S31. <sup>1</sup>H NMR spectrum of **1** measured in CDCl<sub>3</sub> at 25 °C (600 MHz).

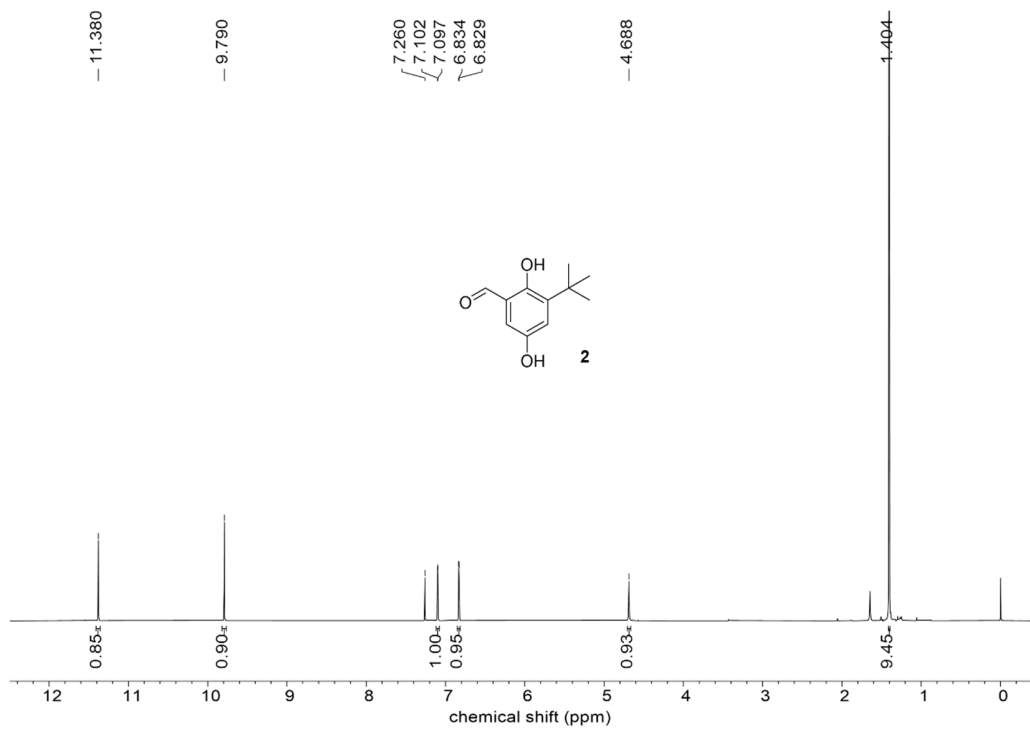

Figure S32. <sup>1</sup>H NMR spectrum of **2** measured in CDCl<sub>3</sub> at 25 °C (600 MHz).

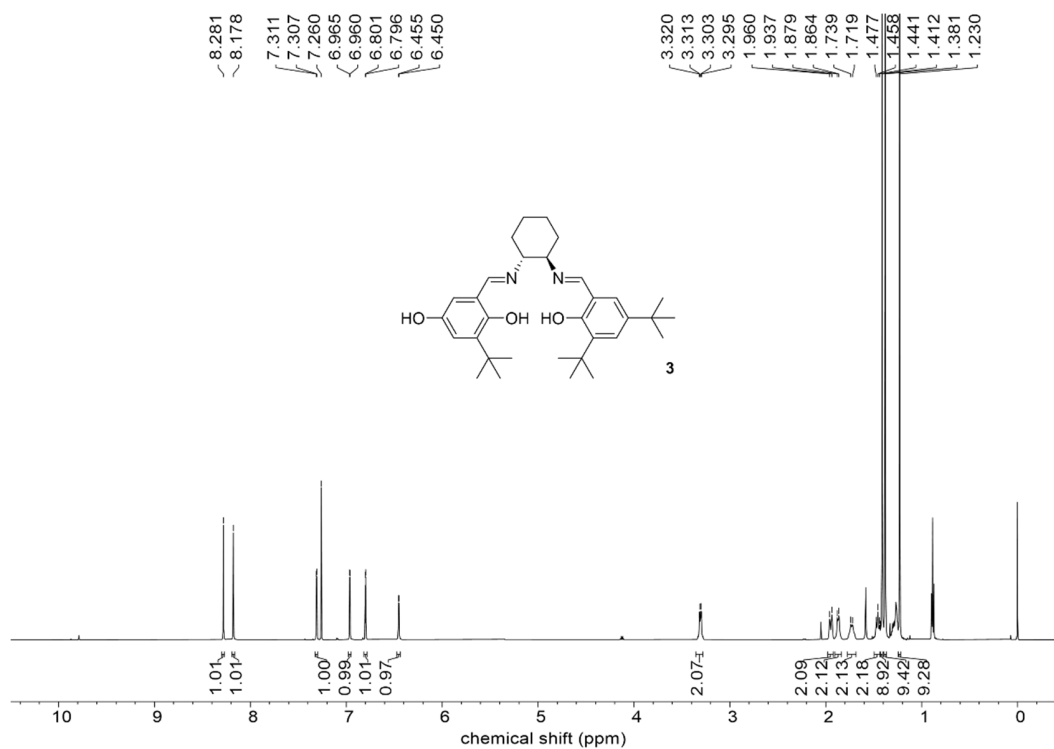

**Figure S33.**  $^1\text{H}$  NMR spectrum of **3** measured in  $\text{CDCl}_3$  at 25 °C (600 MHz).

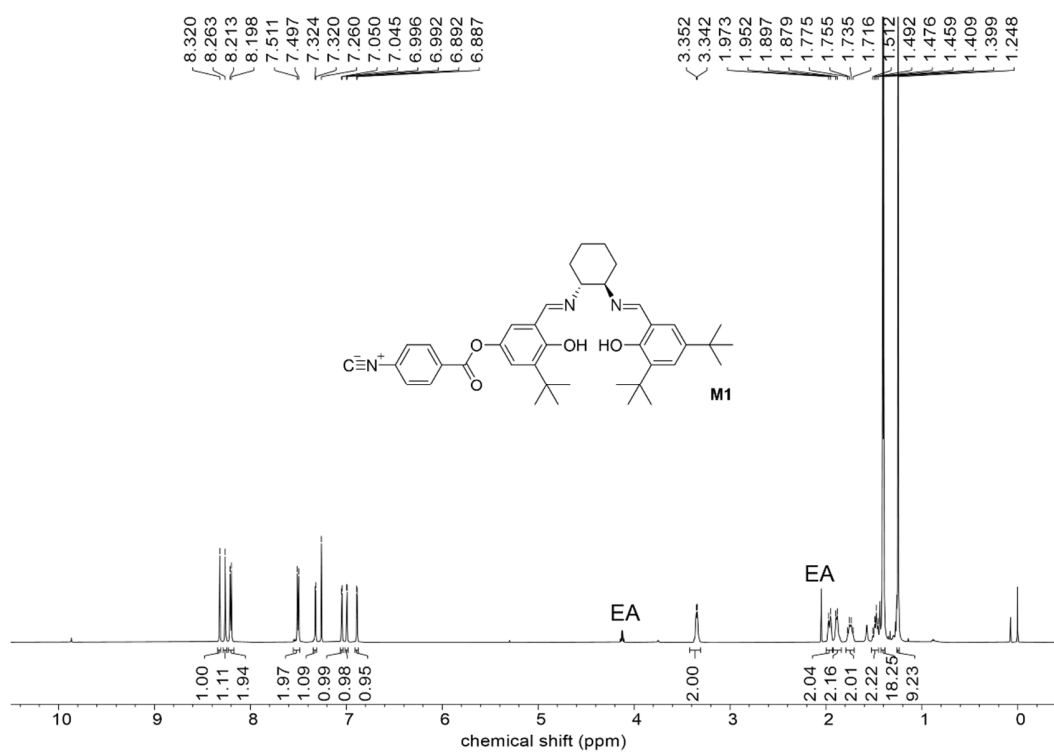

**Figure S34.**  $^1\text{H}$  NMR spectrum of **M1** measured in  $\text{CDCl}_3$  at 25 °C (600 MHz).

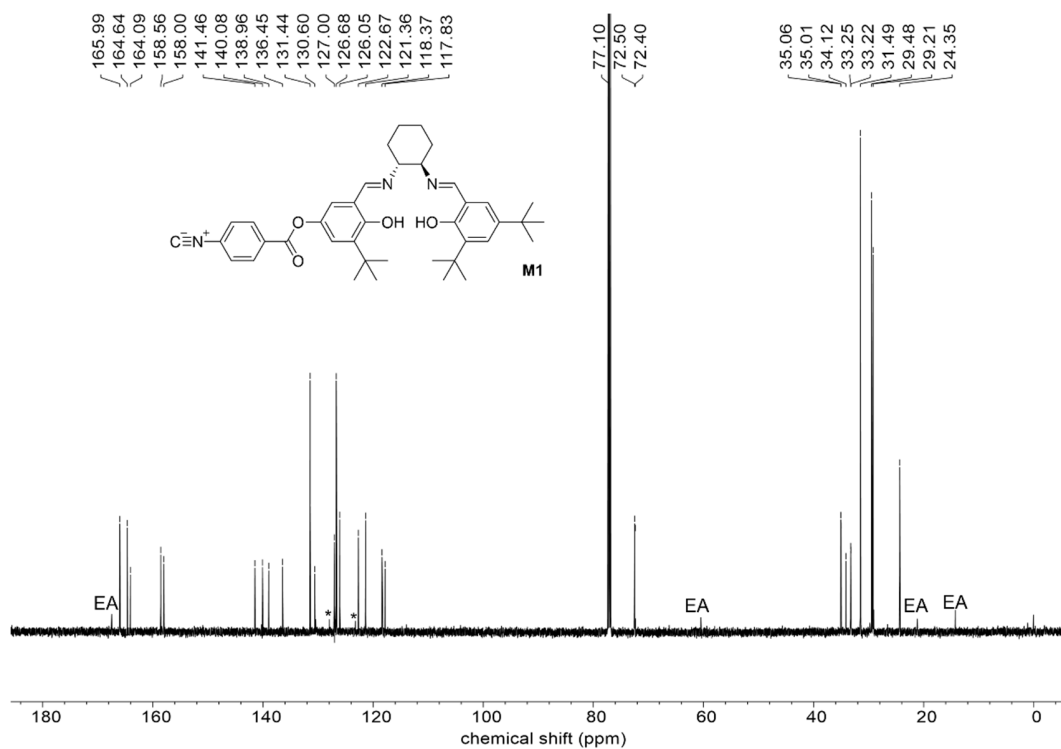

**Figure S35.** <sup>13</sup>C NMR spectrum of **M1** measured in CDCl<sub>3</sub> at 25 °C (151 MHz).

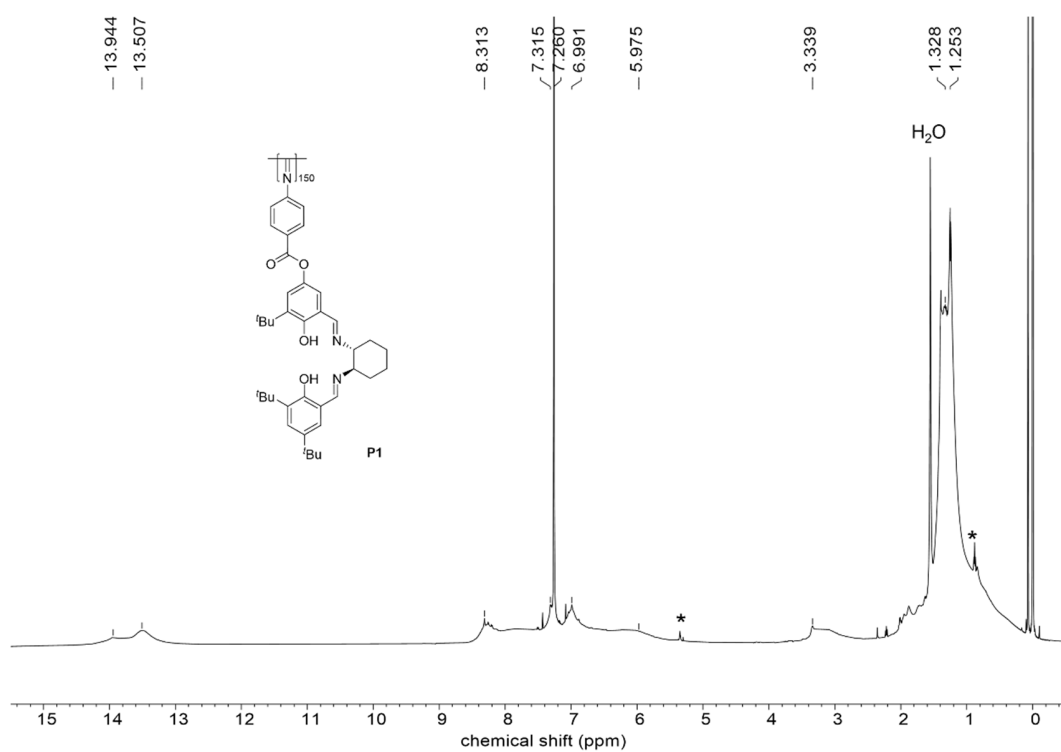

**Figure S36.** <sup>1</sup>H NMR spectrum of **P1** measured in CDCl<sub>3</sub> at 25 °C (600 MHz).



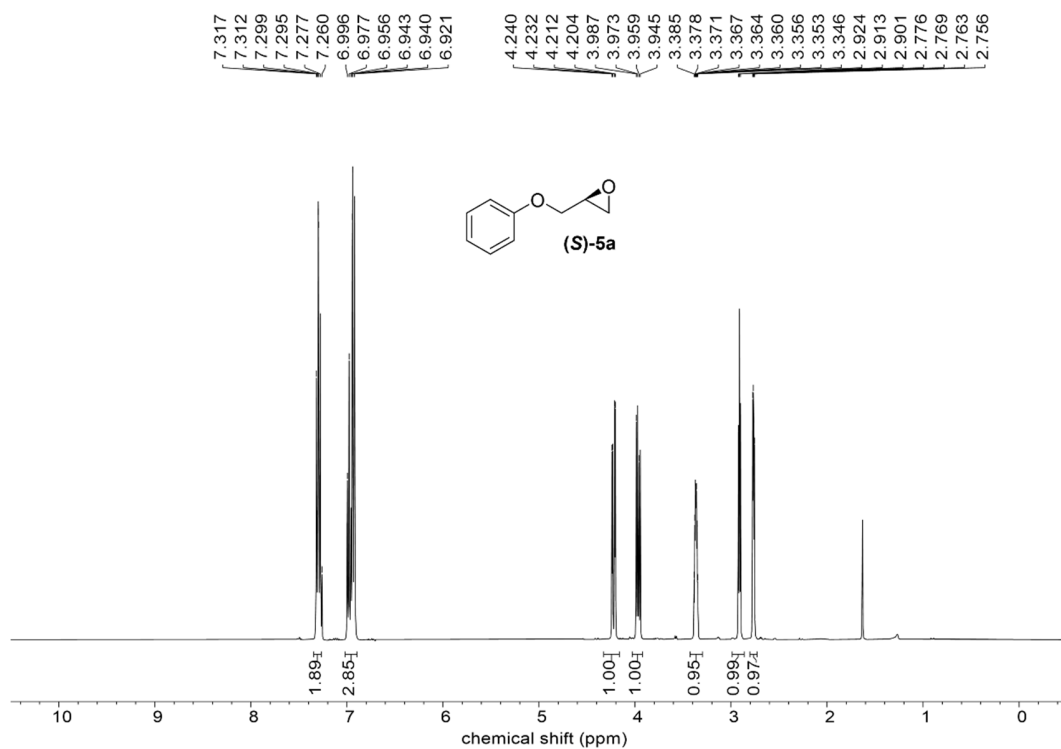

Figure S37.  $^1\text{H}$  NMR spectrum of (S)-5a measured in  $\text{CDCl}_3$  at 25 °C (400 MHz).

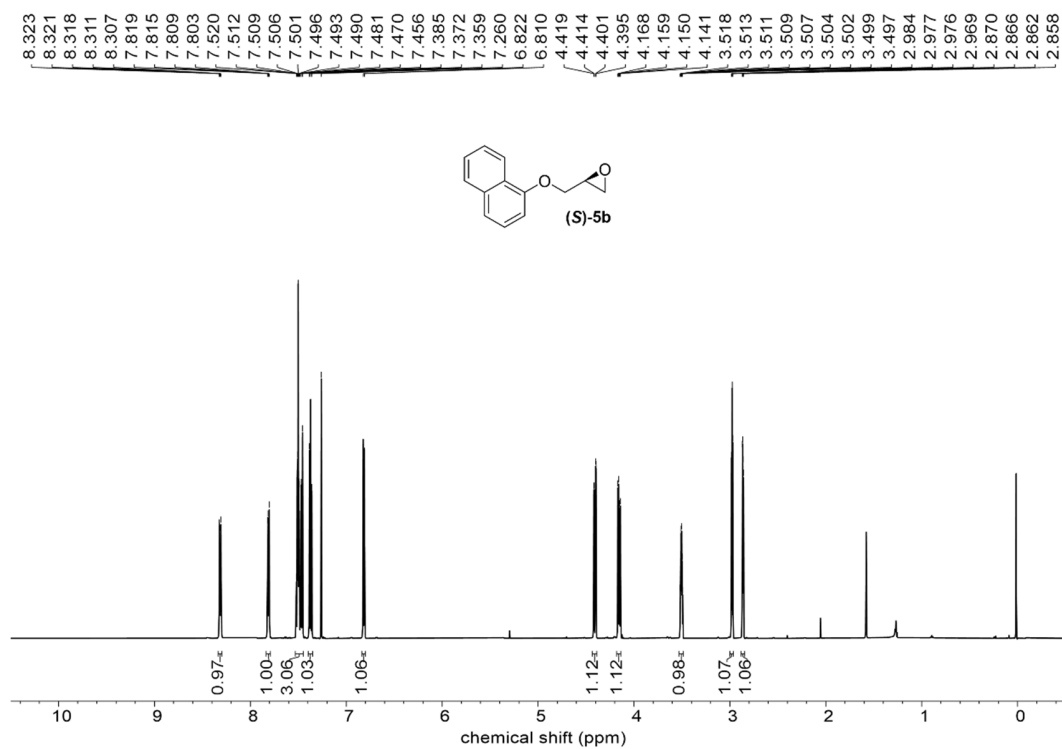

Figure S38.  $^1\text{H}$  NMR spectrum of (S)-5b measured in  $\text{CDCl}_3$  at 25 °C (600 MHz).

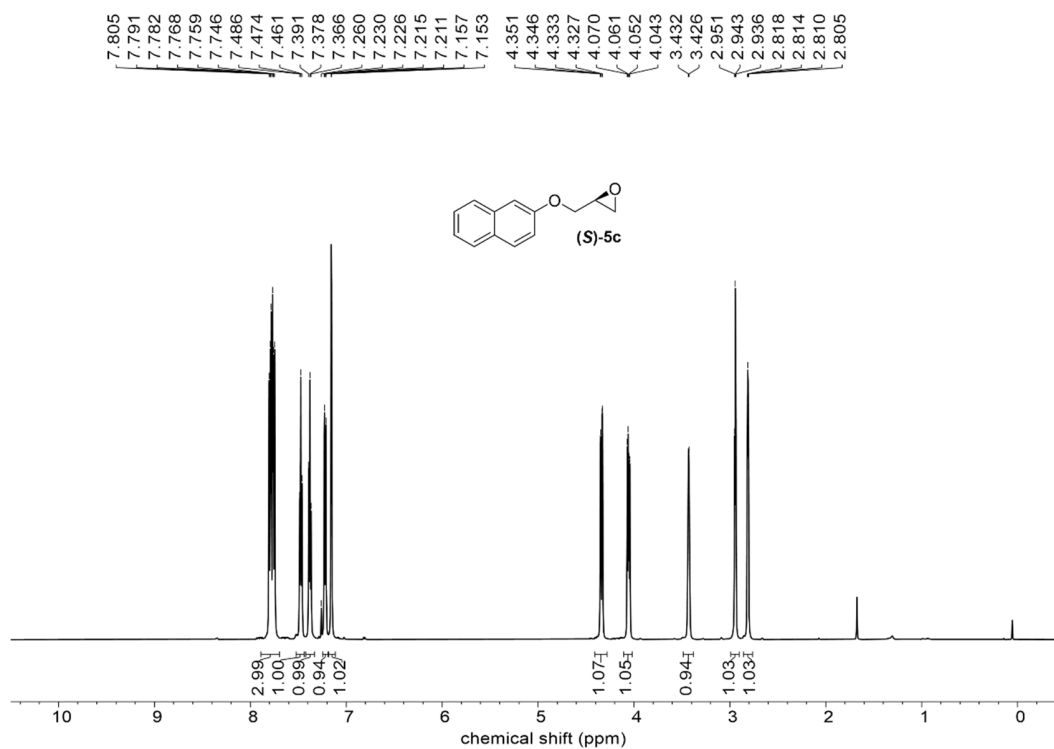

Figure S39.  $^1\text{H}$  NMR spectrum of (S)-5c measured in  $\text{CDCl}_3$  at 25 °C (600 MHz).

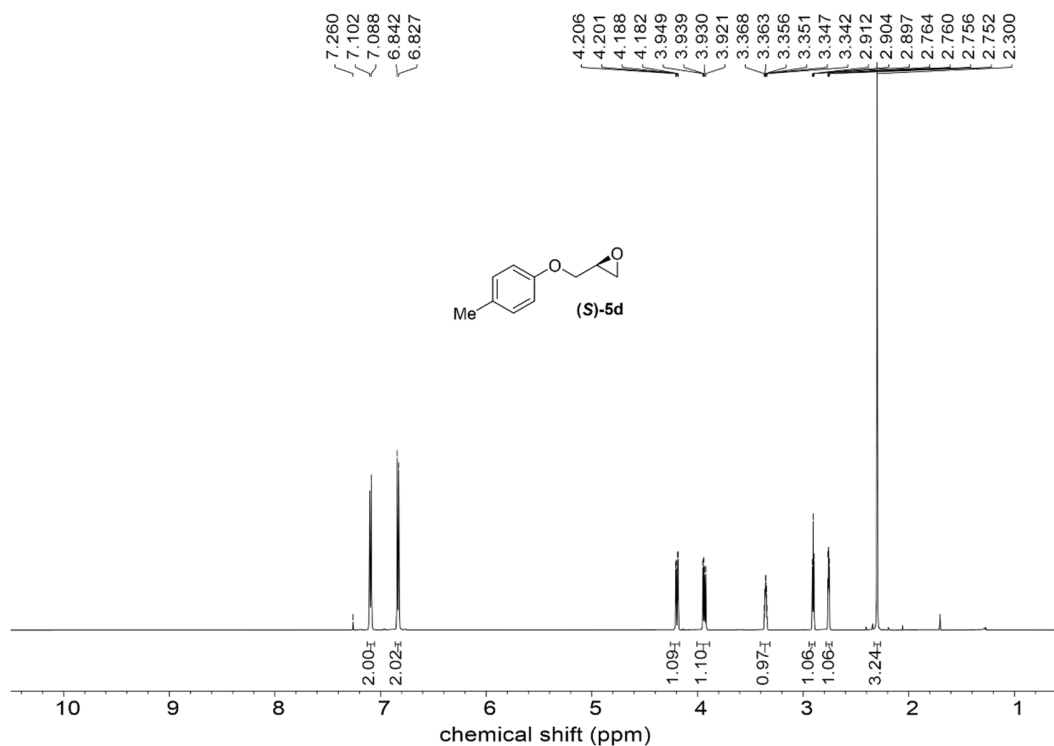

Figure S40.  $^1\text{H}$  NMR spectrum of (S)-5d measured in  $\text{CDCl}_3$  at 25 °C (600 MHz).

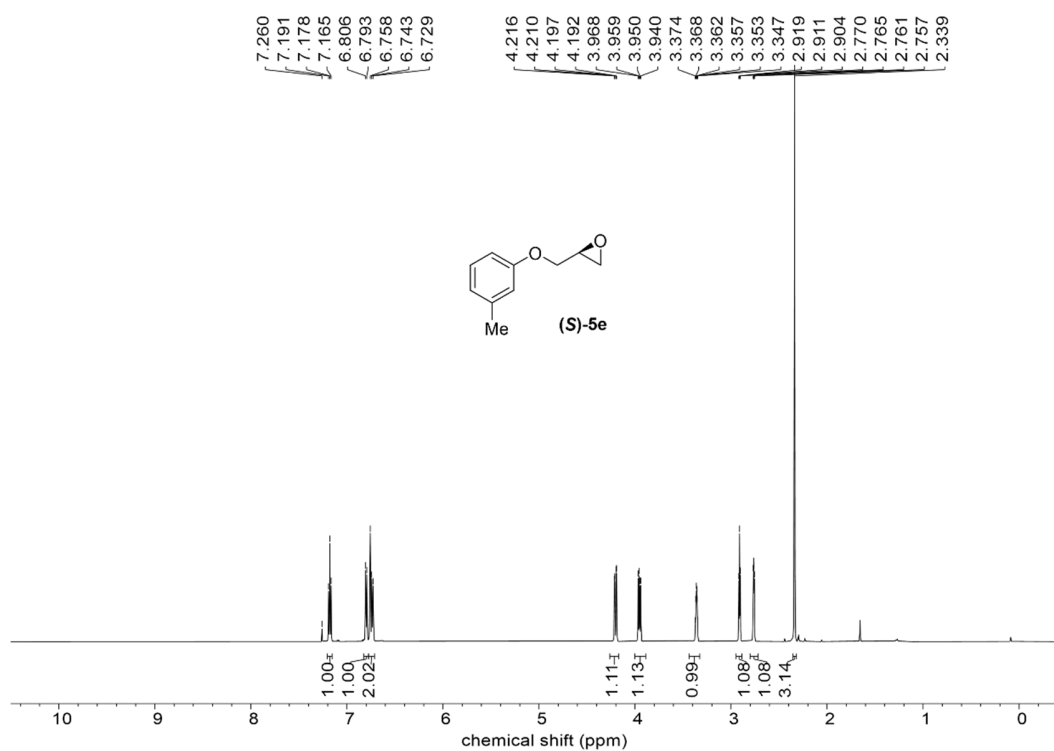

Figure S41.  $^1\text{H}$  NMR spectrum of (S)-5e measured in  $\text{CDCl}_3$  at 25 °C (600 MHz).

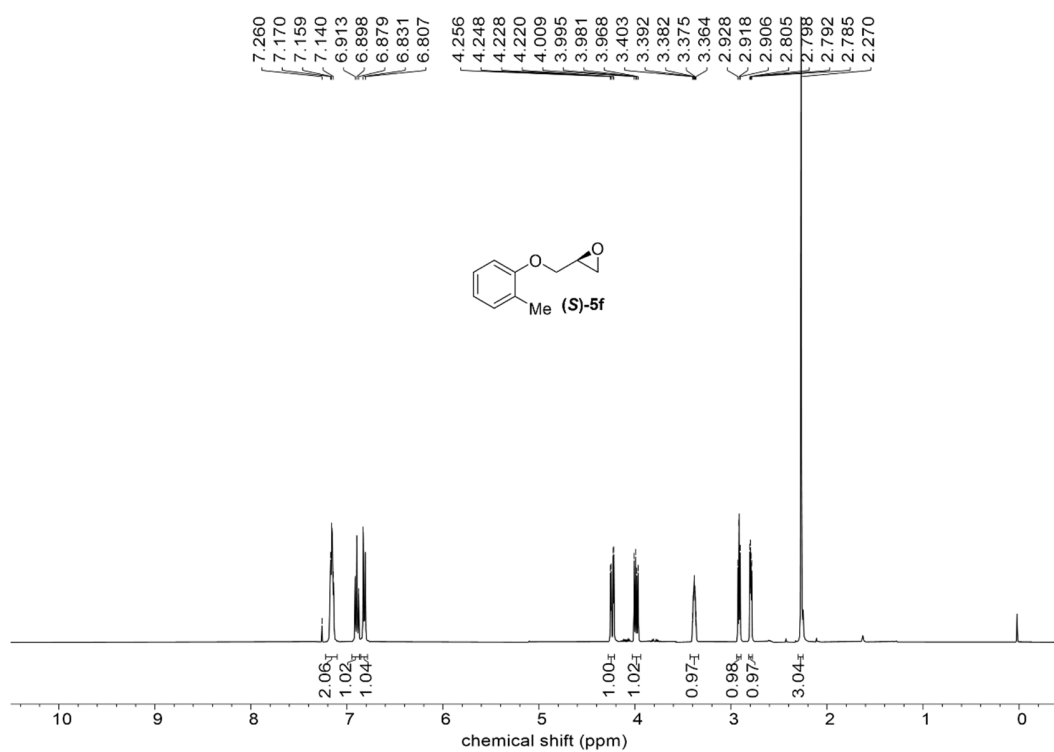

Figure S42.  $^1\text{H}$  NMR spectrum of (S)-5f measured in  $\text{CDCl}_3$  at 25 °C (400 MHz).

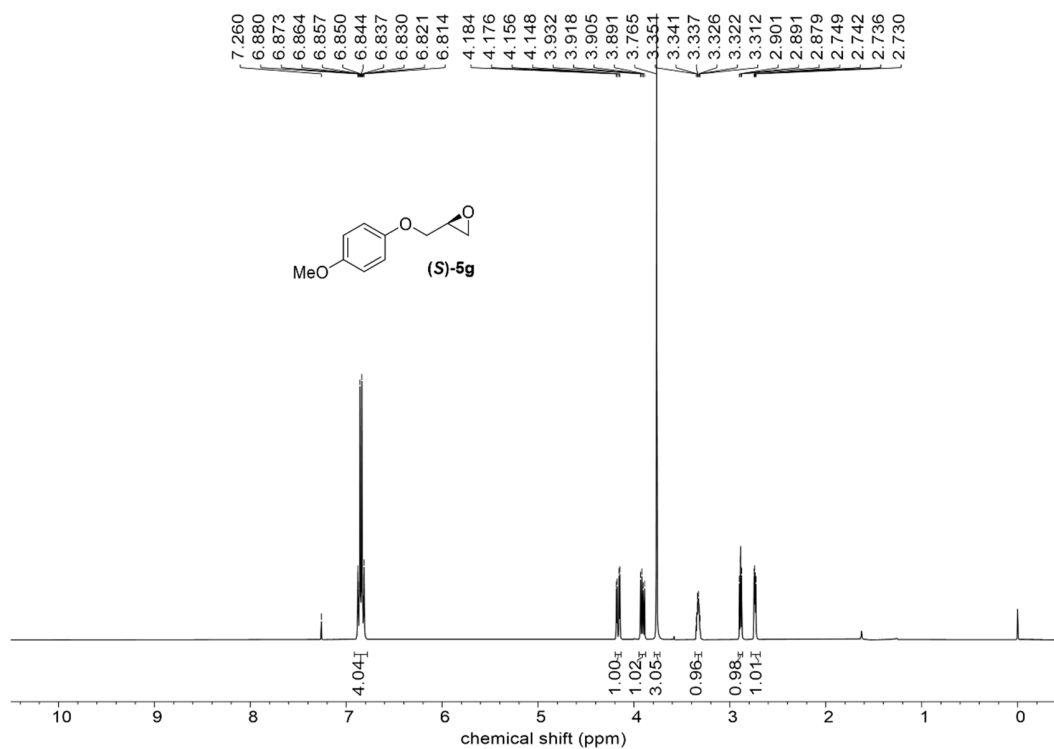

Figure S43.  $^1\text{H}$  NMR spectrum of (S)-5g measured in  $\text{CDCl}_3$  at 25 °C (400 MHz).

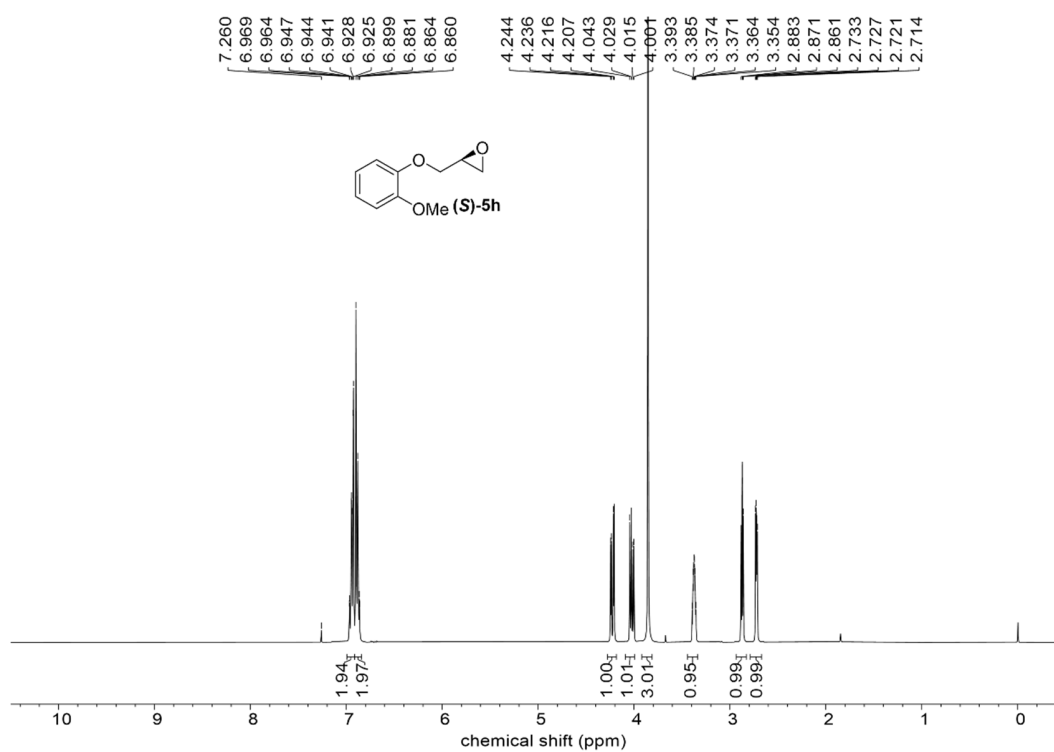

Figure S44.  $^1\text{H}$  NMR spectrum of (S)-5h measured in  $\text{CDCl}_3$  at 25 °C (400 MHz).

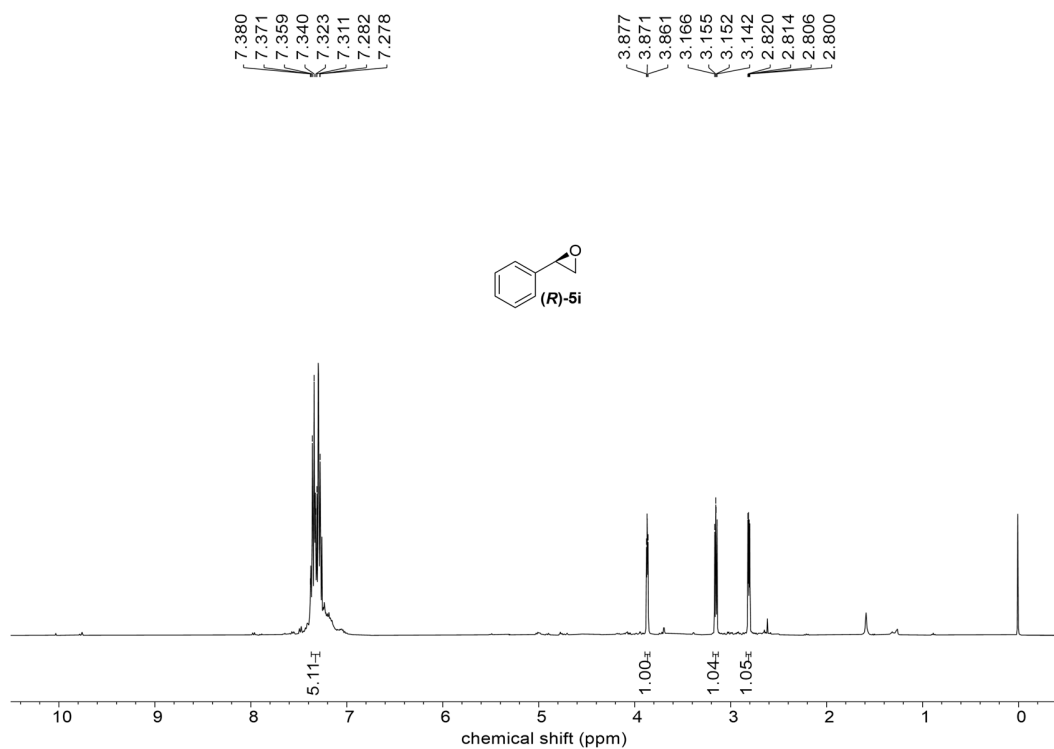

Figure S45. <sup>1</sup>H NMR spectrum of (*S*)-5i measured in CDCl<sub>3</sub> at 25 °C (400 MHz).

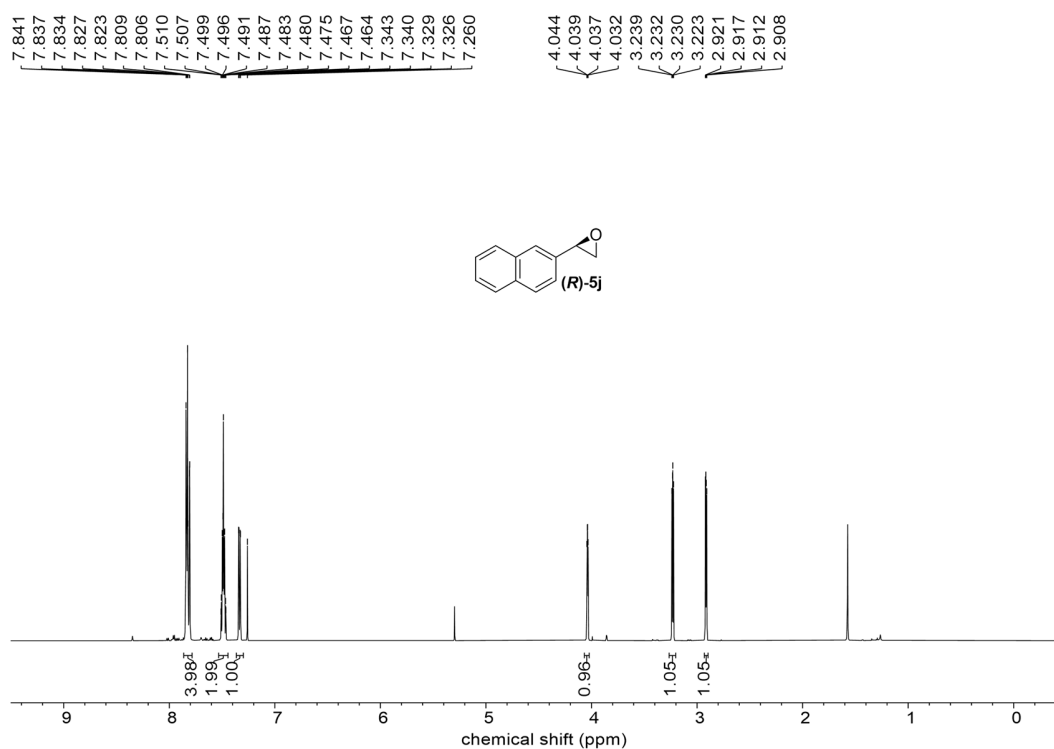

Figure S46. <sup>1</sup>H NMR spectrum of (*S*)-5j measured in CDCl<sub>3</sub> at 25 °C (400 MHz).

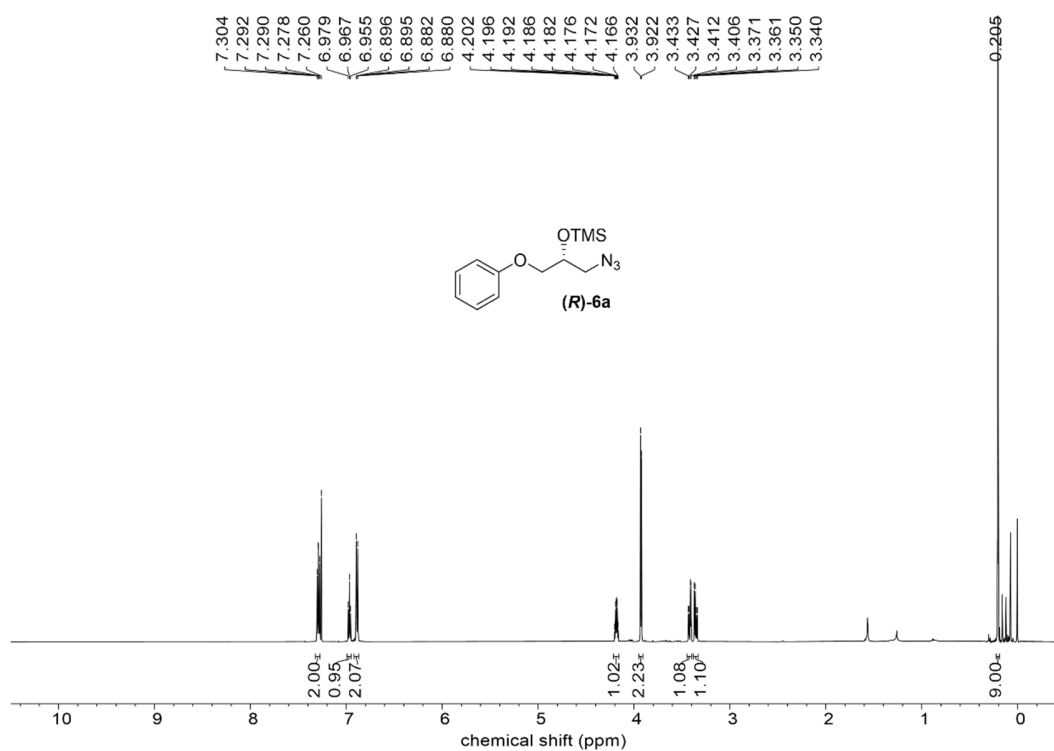

Figure S47.  $^1\text{H}$  NMR spectrum of **(S)-6a** measured in  $\text{CDCl}_3$  at  $25^\circ\text{C}$  (600 MHz).

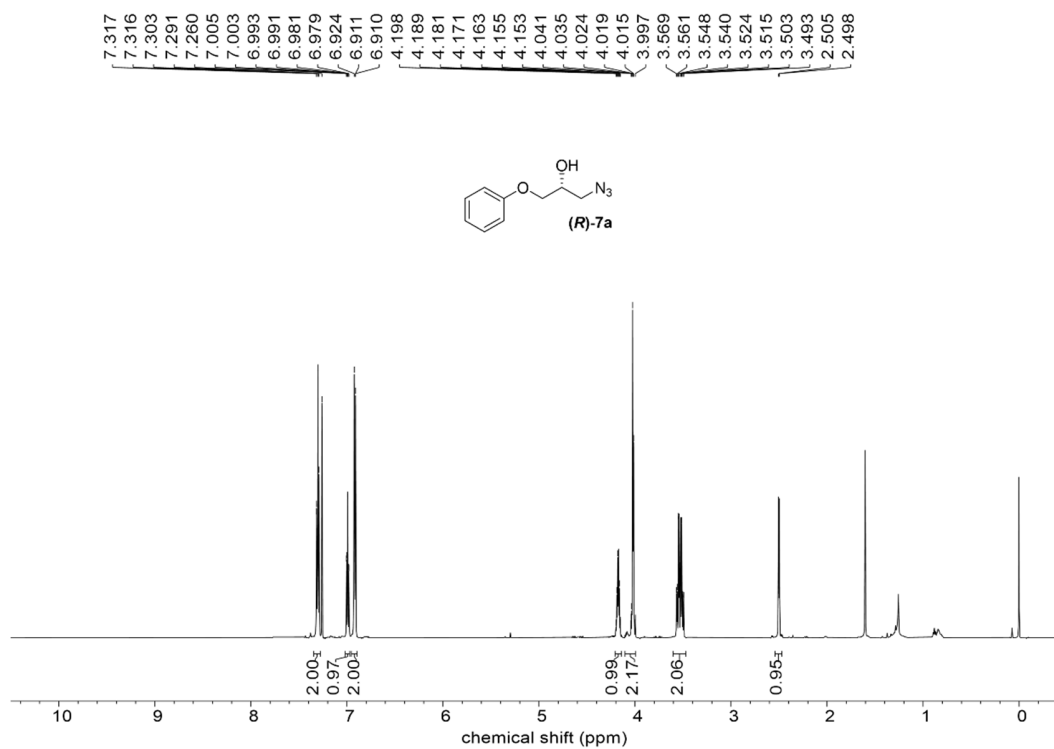

Figure S48.  $^1\text{H}$  NMR spectrum of **(R)-7a** measured in  $\text{CDCl}_3$  at  $25^\circ\text{C}$  (600 MHz).

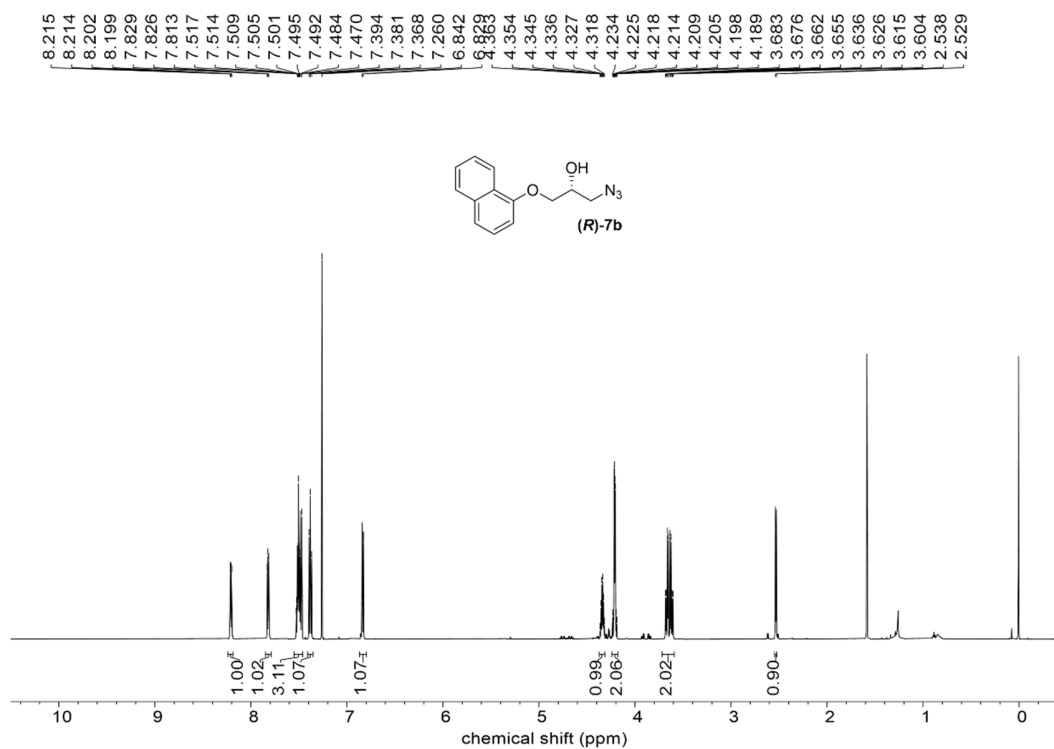

Figure S49.  $^1\text{H}$  NMR spectrum of (*R*)-7b measured in  $\text{CDCl}_3$  at 25 °C (600 MHz).

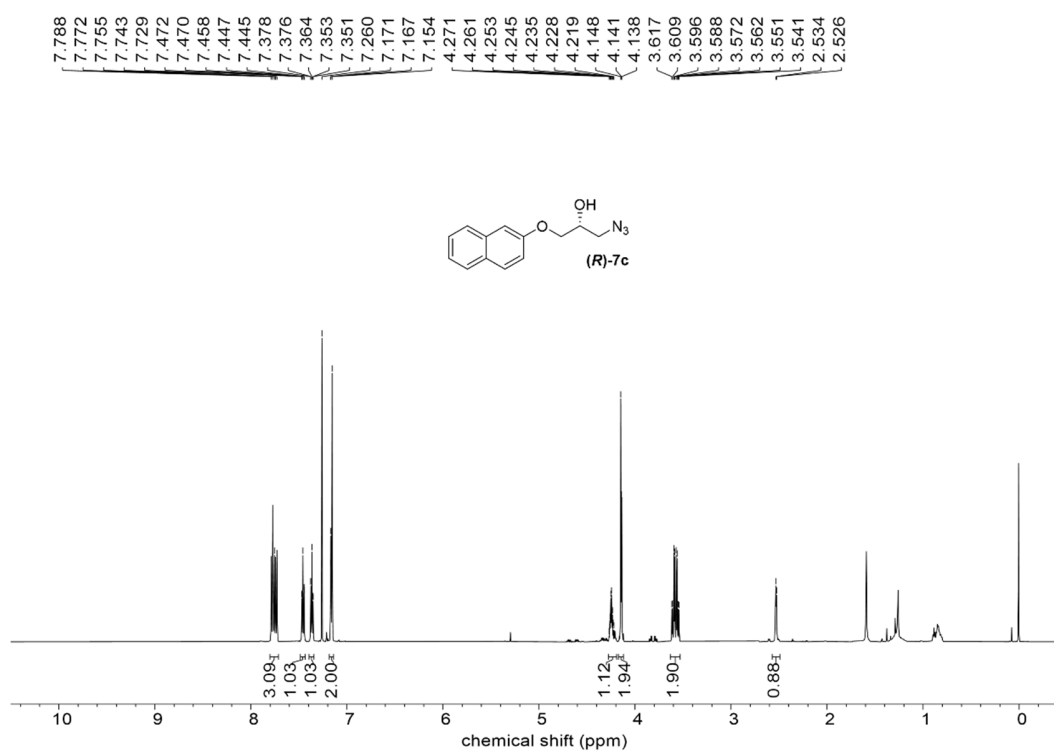

Figure S50.  $^1\text{H}$  NMR spectrum of (*R*)-7c measured in  $\text{CDCl}_3$  at 25 °C (600 MHz).

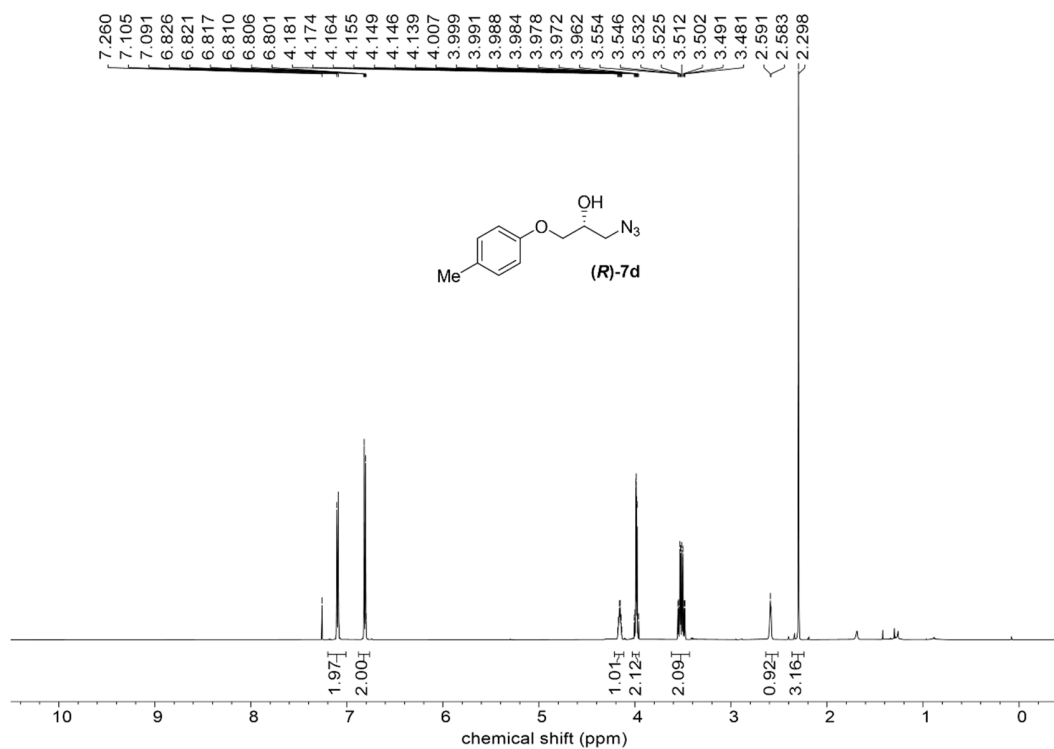

**Figure S51.**  $^1\text{H}$  NMR spectrum of **(R)-7d** measured in  $\text{CDCl}_3$  at  $25^\circ\text{C}$  (600 MHz).

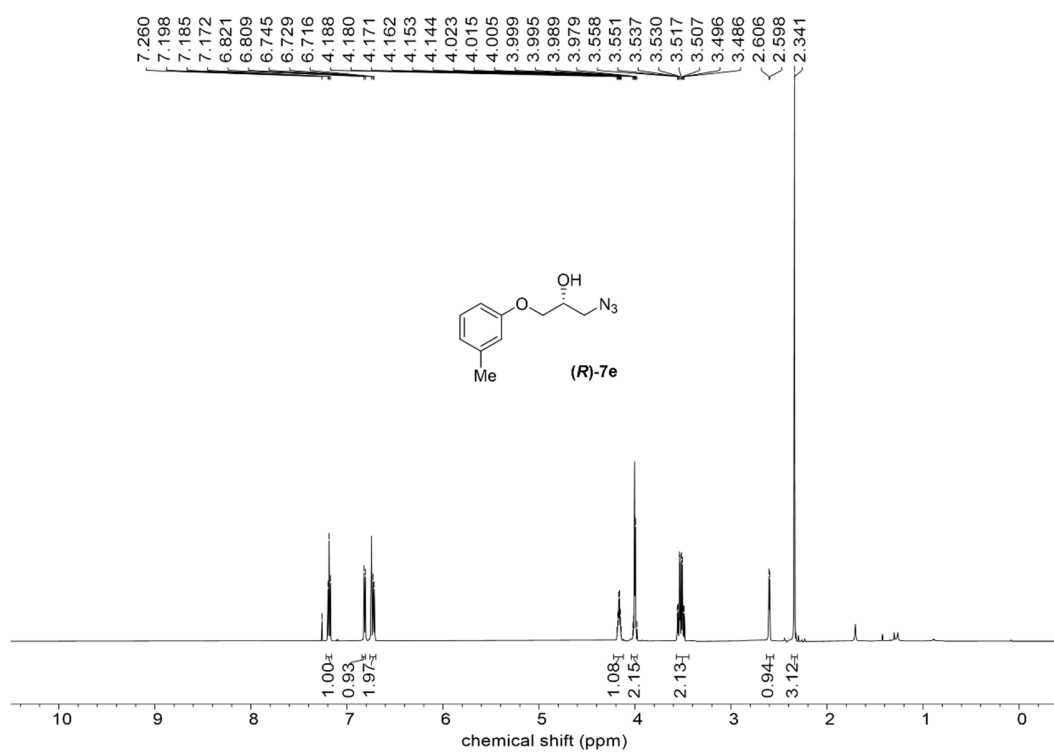

**Figure S52.**  $^1\text{H}$  NMR spectrum of **(R)-7e** measured in  $\text{CDCl}_3$  at  $25^\circ\text{C}$  (600 MHz).



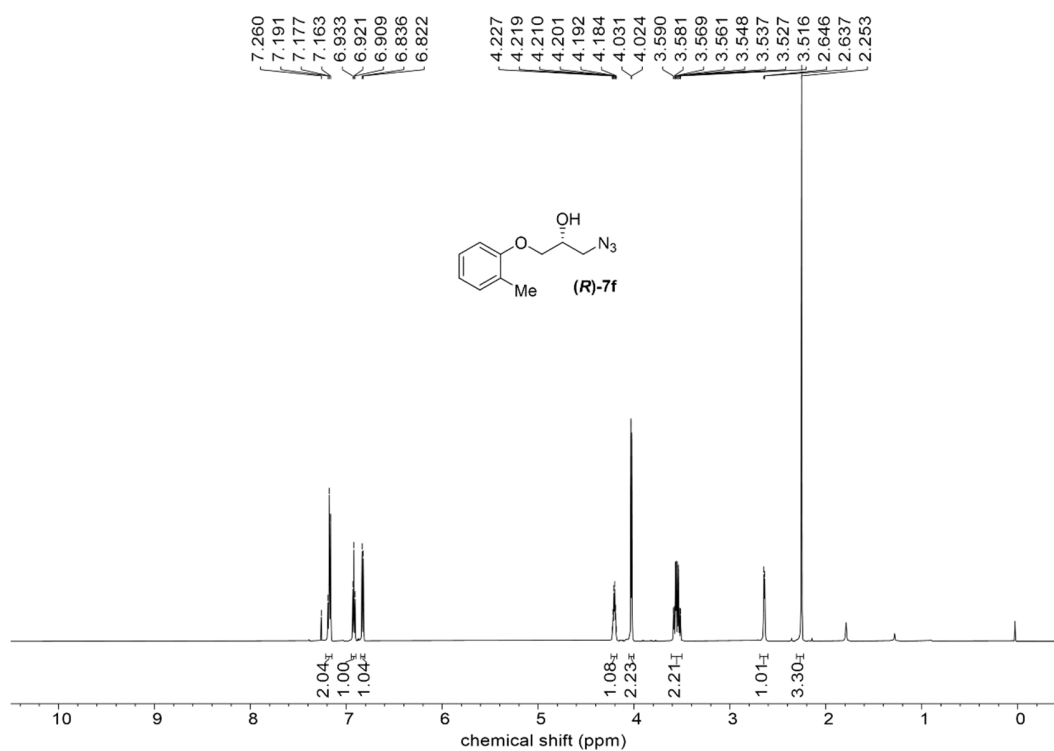

Figure S53. <sup>1</sup>H NMR spectrum of **(R)-7f** measured in CDCl<sub>3</sub> at 25 °C (600 MHz).

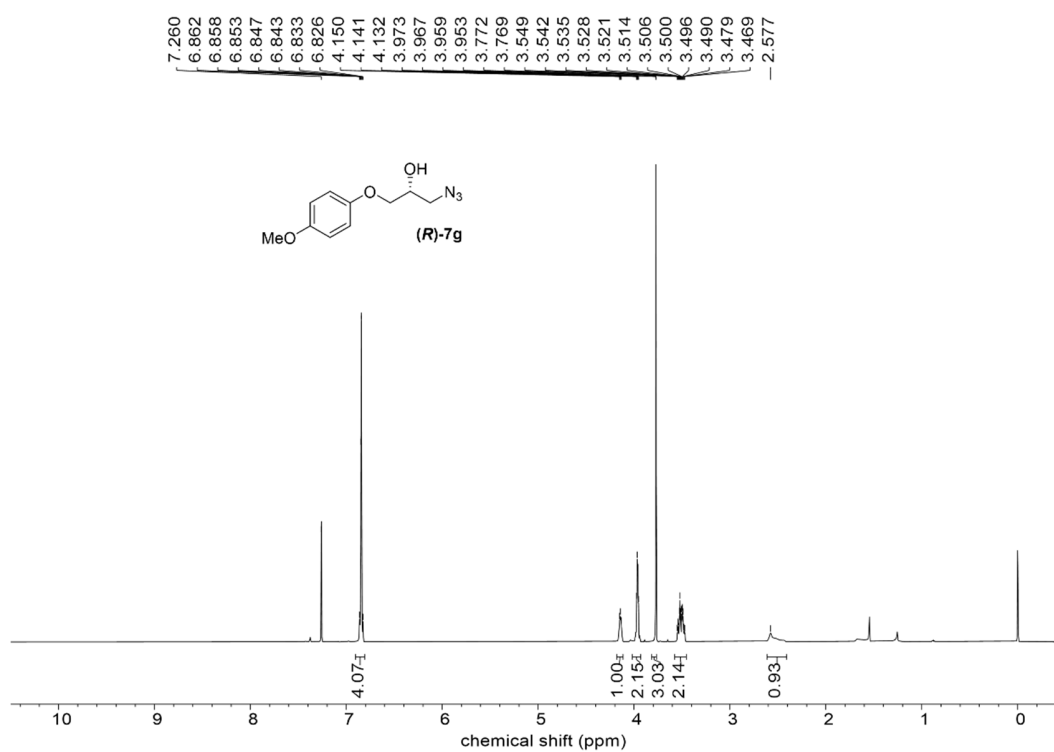

Figure S54. <sup>1</sup>H NMR spectrum of **(R)-7g** measured in CDCl<sub>3</sub> at 25 °C (600 MHz).

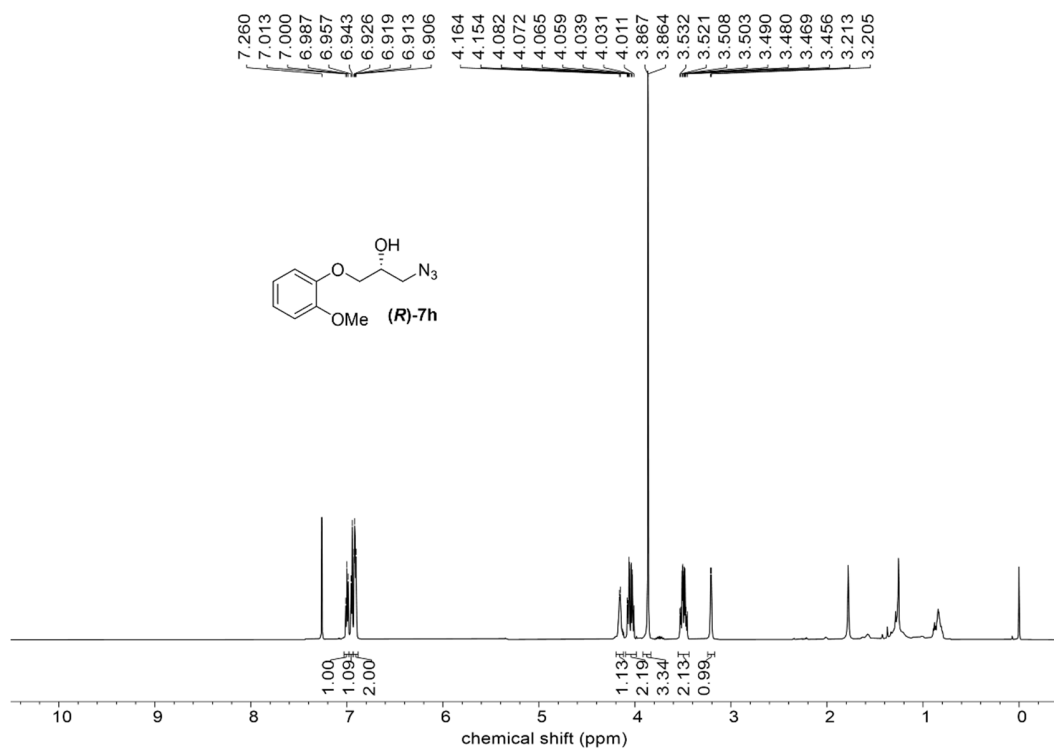

Figure S55.  $^1\text{H}$  NMR spectrum of **(R)-7h** measured in  $\text{CDCl}_3$  at 25 °C (600 MHz).

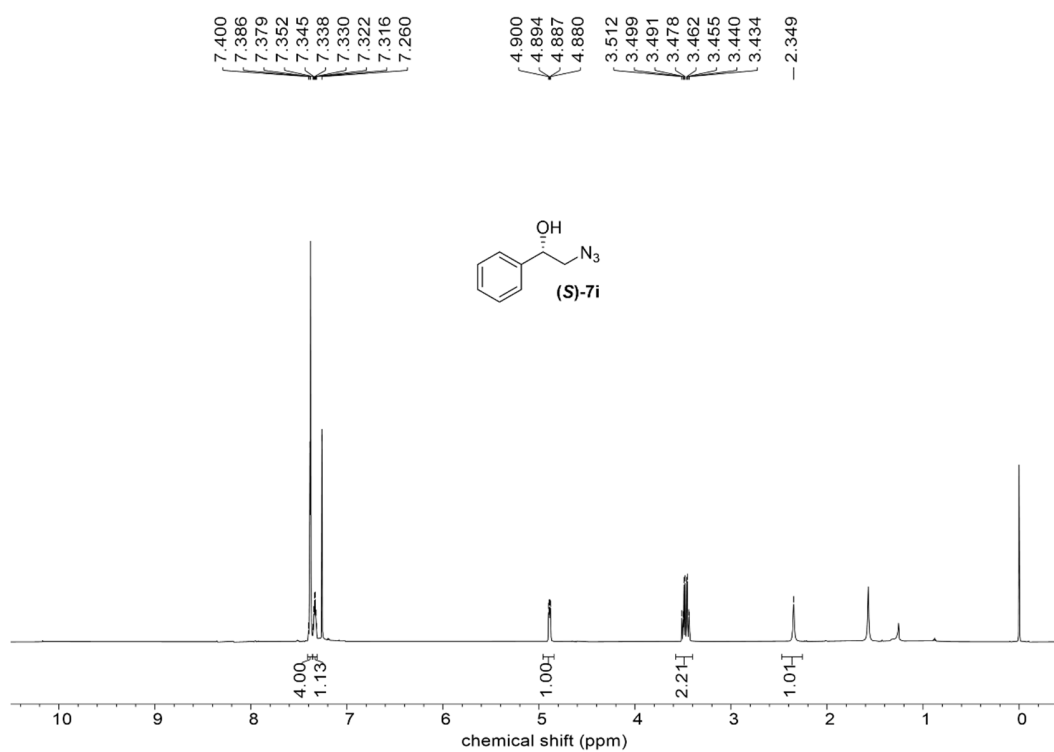

Figure S56.  $^1\text{H}$  NMR spectrum of **(S)-7i** measured in  $\text{CDCl}_3$  at 25 °C (600 MHz).

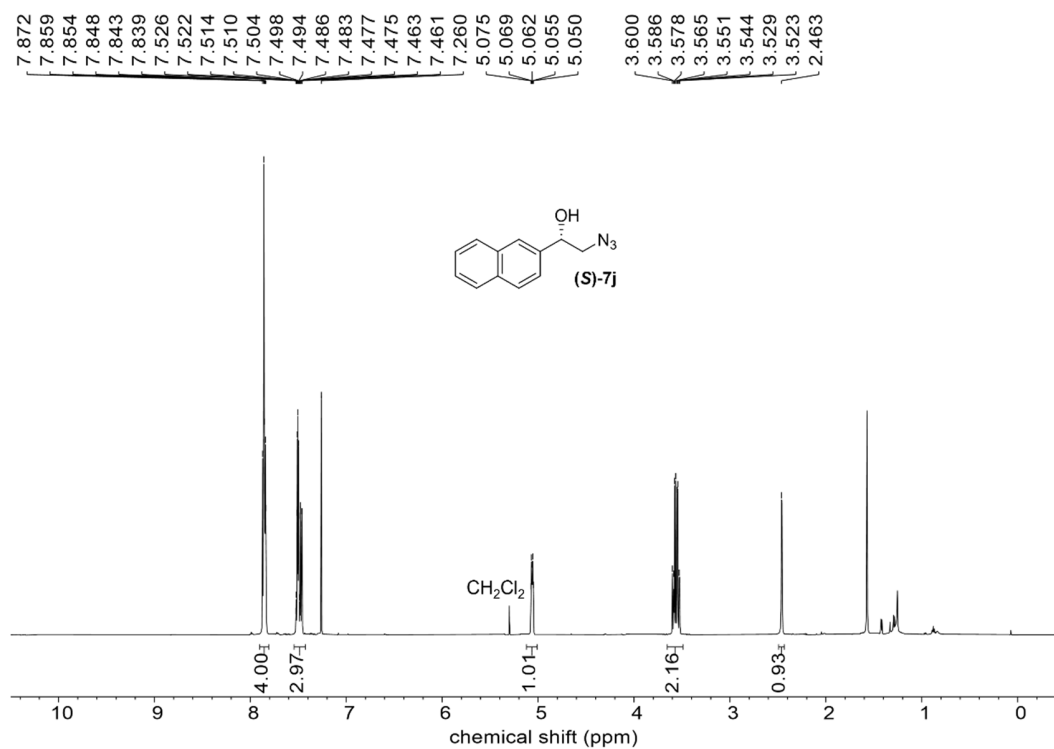

Figure S57. <sup>1</sup>H NMR spectrum of (S)-7j measured in CDCl<sub>3</sub> at 25 °C (600 MHz).

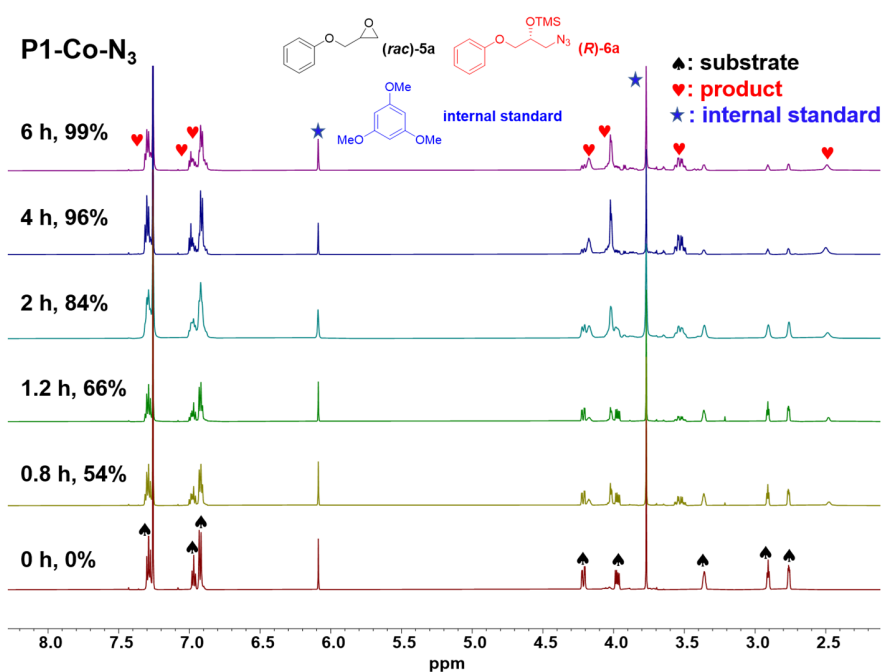

Figure S58. Stacked <sup>1</sup>H NMR spectra of kinetic resolution from (±)-5a to (R)-6a using P1-Co-N<sub>3</sub> as the catalyst under different reaction stages. Measured conditions: CDCl<sub>3</sub>, 25 °C, and 600 MHz NMR.

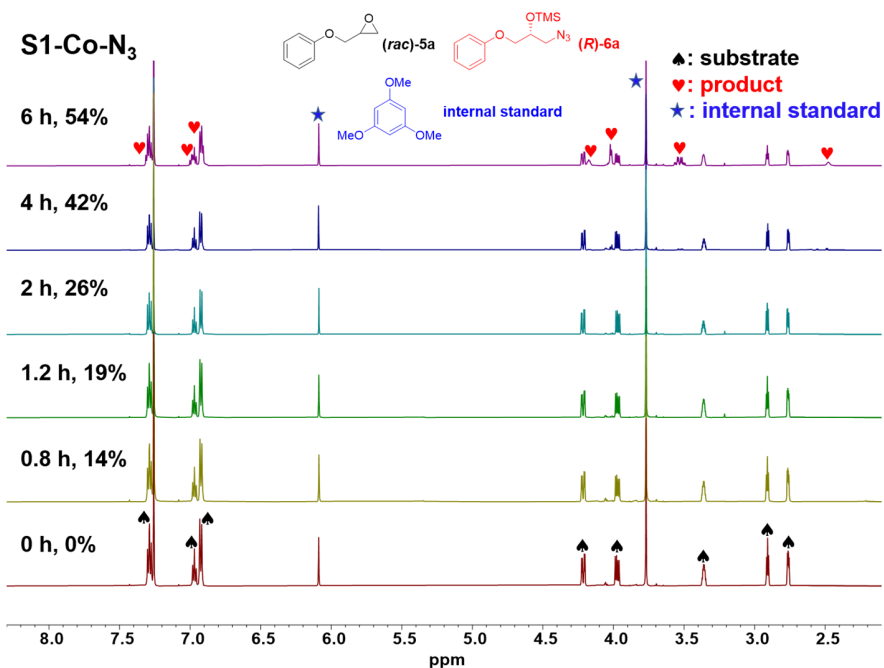

**Figure S59.** Stacked <sup>1</sup>H NMR spectra of reaction from (±)-5a to (S)-6a using S1-Co-N<sub>3</sub> as the catalyst under different reaction stages. Measured conditions: CDCl<sub>3</sub>, 25 °C, and 600 MHz NMR.

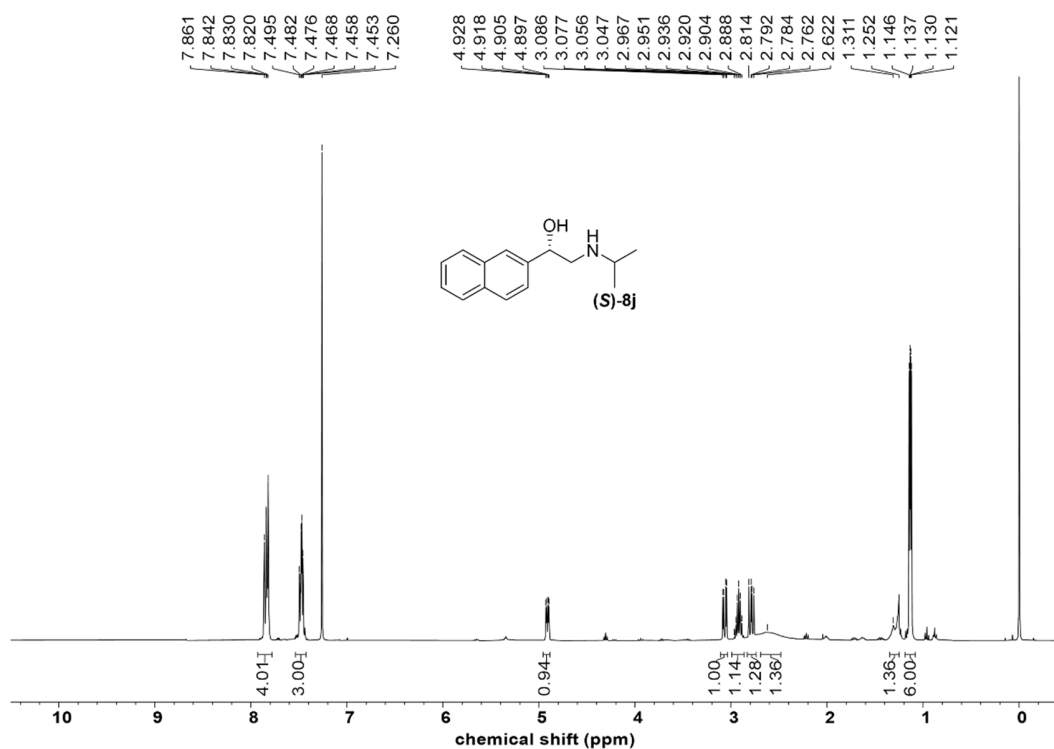

**Figure S60.** <sup>1</sup>H NMR spectrum of (S)-8j measured in CDCl<sub>3</sub> at 25 °C (600 MHz).

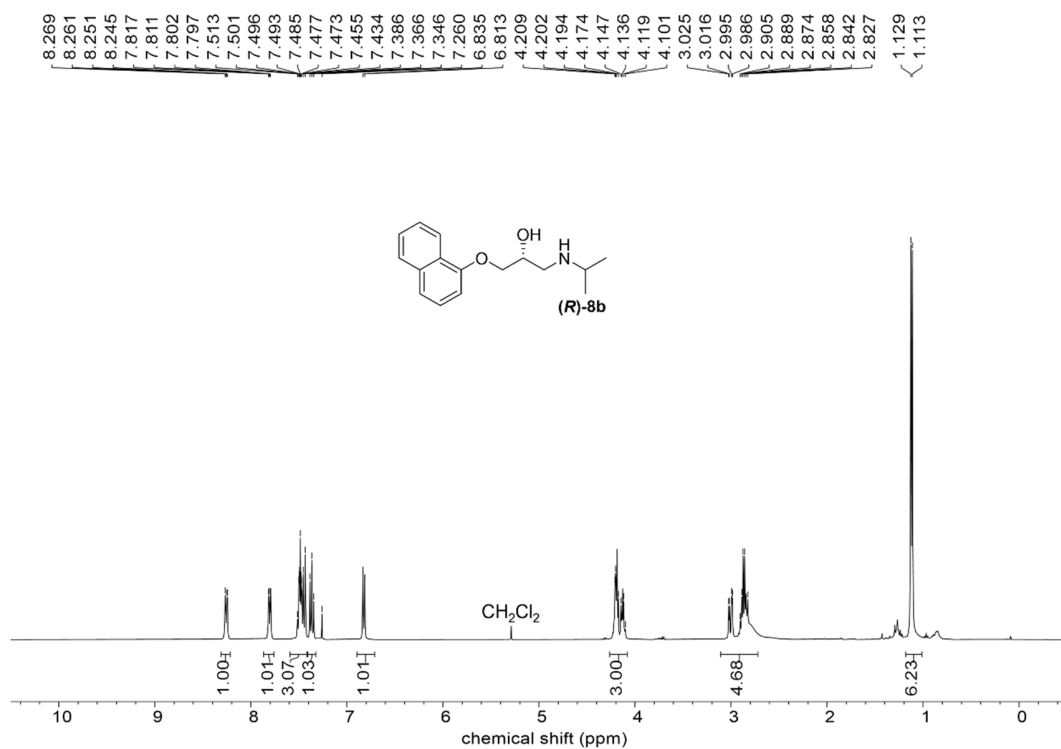

**Figure S61.** <sup>1</sup>H NMR spectrum of **(R)-8b** measured in CDCl<sub>3</sub> at 25 °C (400 MHz).

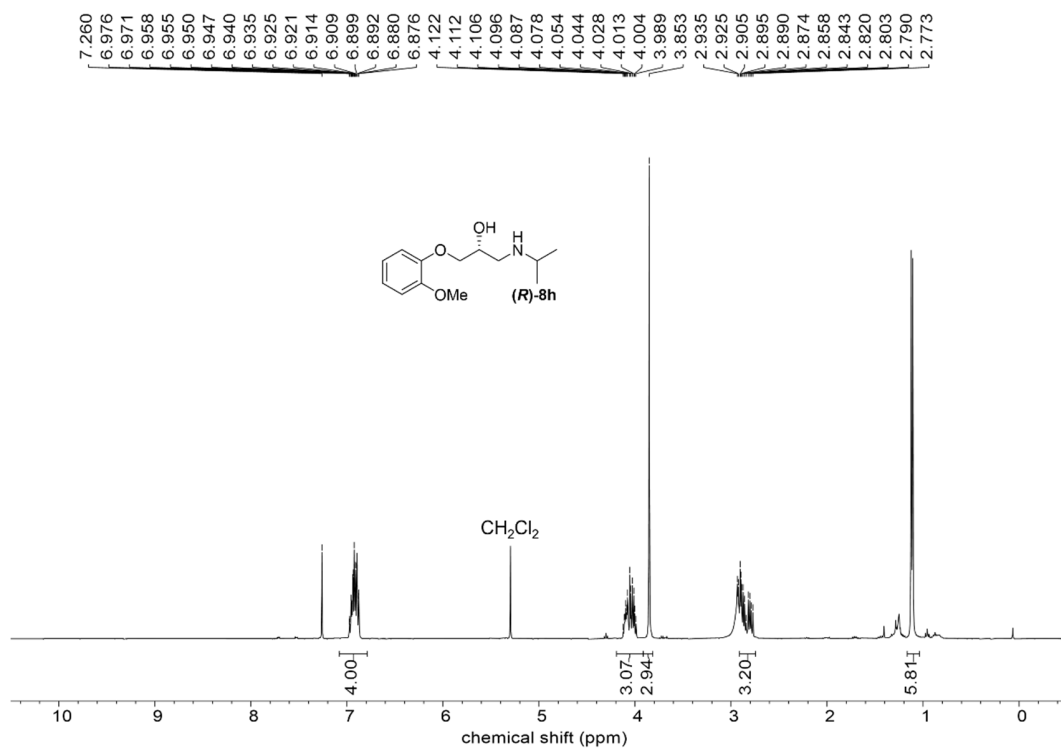

**Figure S62.** <sup>1</sup>H NMR spectrum of **(R)-8h** measured in CDCl<sub>3</sub> at 25 °C (400 MHz).

## References

- [1] Kalow JA, Doyle AG. Mechanistic investigations of cooperative catalysis in the enantioselective fluorination of epoxides. *J Am Chem Soc*, 2011, 133(40): 16001-16012
- [2] Rossbach BM, Leopold K, Weberskirch R. Self-assembled nanoreactors as highly active catalysts in the hydrolytic kinetic resolution (hkr) of epoxides in water. *Angew Chem Int Ed*, 2006, 45(8): 1309-1312
- [3] Liu B, Gao Y, Zhao X, et al. Alternating copolymerization of carbon dioxide and propylene oxide under bifunctional cobalt salen complexes: Role of lewis base substituent covalent bonded on salen ligand. *J Polym Sci, Part A: Polym Chem*, 2010, 48(2): 359-365
- [4] Kong X-D, Yu H-L, Yang S, et al. Chemoenzymatic synthesis of ( r )- and ( s )-propranolol using an engineered epoxide hydrolase with a high turnover number. *J Mol Catal B: Enzym*, 2015, 122(275-281)
- [5] Kim B, Chae C-G, Satoh Y, et al. Synthesis of hard-soft-hard triblock copolymers, poly(2-naphthyl glycidyl ether)-block-poly[2-(2-(2-methoxyethoxy)ethoxy)ethyl glycidyl ether]-block-poly(2-naphthyl glycidyl ether), for solid electrolytes. *Macromolecules*, 2018, 51(6): 2293-2301
- [6] Chew RJ, Wills M. Exploitation of differential electronic densities for the stereoselective reduction of ketones bearing a masked amino surrogate. *J Catal*, 2018, 361(40-44)
- [7] Luo S, Weng C, Qin Z, et al. Tandem h/d exchange-set reductive deuteration strategy for the synthesis of alpha,beta-deuterated amines using d(2)o. *J Org Chem*, 2021, 86(17): 11862-11870
- [8] Liu W, Li W, Spannenberg A, et al. Iron-catalysed regioselective hydrogenation of terminal epoxides to alcohols under mild conditions. *Nat Catal*, 2019, 2(6): 523-528
- [9] Procopio A, Costanzo P, Dalpozzo R, et al. Efficient ring opening of epoxides with trimethylsilyl azide and cyanide catalyzed by erbium(iii) triflate. *Tetrahedron Lett*, 2010, 51(39): 5150-5153
- [10] Kang SK, Ha JD, Cheon H-G, et al. Preparation of diastereomeric  $\beta$ -aryloxymethylaminoalcohols containing nicotinic acid moiety and their binding affinity to  $\beta$ 3-adrenoreceptors. *Bull Korean Chem Soc*, 2003, 24(9): 1381-1384
- [11] Kon Y, Nakashima T, Hong D, et al. Chemoselective epoxidation of allyloxybenzene by hydrogen peroxide over mfi-type titanosilicate. *Eur J Org Chem*, 2020, 2020(15): 2260-2263
- [12] Solis-Munana P, Salam J, Ren CZJ, et al. An amphiphilic (salen)co complex - utilizing hydrophobic interactions to enhance the efficiency of a cooperative catalyst. *Adv Synth Catal*, 2021, 363(13): 3207-3213
- [13] Pchelka BK, Loupy A, Petit A. Improvement and simplification of synthesis of 3-aryloxy-1,2-epoxypropanes using solvent-free conditions and microwave irradiations. Relation with medium effects and reaction mechanism. *Tetrahedron*, 2006, 62(47): 10968-10979
- [14] Liao H, Chou Y, Wang Y, et al. Multistep organic transformations over base-rhodium/diamine-bifunctionalized mesostructured silica nanoparticles. *ChemCatChem*, 2017, 9(16): 3197-3202
- [15] Ballerini E, Crotti P, Frau I, et al. A waste-minimized protocol for the preparation of 1,2-azido alcohols and 1,2-amino alcohols. *Green Chem*, 2013, 15(9): 2394-2400
- [16] Chen S-W, Thakur SS, Li W, et al. Efficient catalytic synthesis of optically pure 1,2-azido alcohols through enantioselective epoxide ring opening with hn3. *J Mol Catal A: Chem*, 2006, 259(1-2): 116-120

- [17] Sabitha G, Babu RS, Rajkumar M, et al. Cerium(iii) chloride promoted highly regioselective ring opening of epoxides and aziridines using  $\text{nan}(3)$  in acetonitrile: A facile synthesis of 1,2-azidoalcohols and 1,2-azidoamines. *Org Lett*, 2002, 4(3): 343-345
- [18] Pchelka BK, Loupy A, Plenkiewicz J, et al. Resolution of racemic 1-azido-3-aryloxy-2-propanols by lipase-catalyzed enantioselective acetylation. *Tetrahedron: Asymmetry*, 2000, 11(13): 2719-2732
- [19] He L, Wanunu M, Byun H-S, et al. Regioselective and stereospecific azidation of 1,2- and 1,3-diols by azidotrimethylsilane via a Mitsunobu reaction. *J Org Chem*, 1999, 64(16): 6049-6055
- [20] Kamal A, Arifuddin M, Rao MV. Enantioselective ring opening of epoxides with trimethylsilyl azide ( $\text{tmsn}_3$ ) in the presence of  $\beta$ -cyclodextrin: An efficient route to 1,2-azido alcohols. *Tetrahedron: Asymmetry*, 1999, 10(22): 4261-4264
- [21] Wu JF, Wan NW, Li YN, et al. Regiodivergent and stereoselective hydroxyazidation of alkenes by biocatalytic cascades. *iScience*, 2021, 24(8): 102883
- [22] Guha NR, Neyyappadath RM, Greenhalgh MD, et al. Evaluating polymer-supported isothioureia catalysis in industrially-preferable solvents for the acylative kinetic resolution of secondary and tertiary heterocyclic alcohols in batch and flow. *Green Chem*, 2018, 20(19): 4537-4546
- [23] Mesas-Sánchez L, Díaz-Álvarez AE, Dinér P. Non-enzymatic kinetic resolution of 1,2-azidoalcohols using a planar-chiral dmap derivative catalyst. *Tetrahedron*, 2013, 69(2): 753-757
- [24] Larrow JF, Schaus SE, Jacobsen EN. Kinetic resolution of terminal epoxides via highly regioselective and enantioselective ring opening with  $\text{tmsn}_3$ . An efficient, catalytic route to 1,2-amino alcohols. *J Am Chem Soc*, 1996, 118(31): 7420-7421
- [25] White JD, Shaw S. A new catalyst for the asymmetric Henry reaction: Synthesis of beta-nitroethanols in high enantiomeric excess. *Org Lett*, 2012, 14(24): 6270-6273
